# Supplementary material for: Stoichiometric and catalytic reductive aldol cyclizations of alkynediones induced by Stryker's reagent
Source: Royal Society of Chemistry journal article supplement (doi:10.1039/b407842j), 2004-01-01

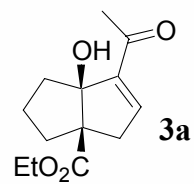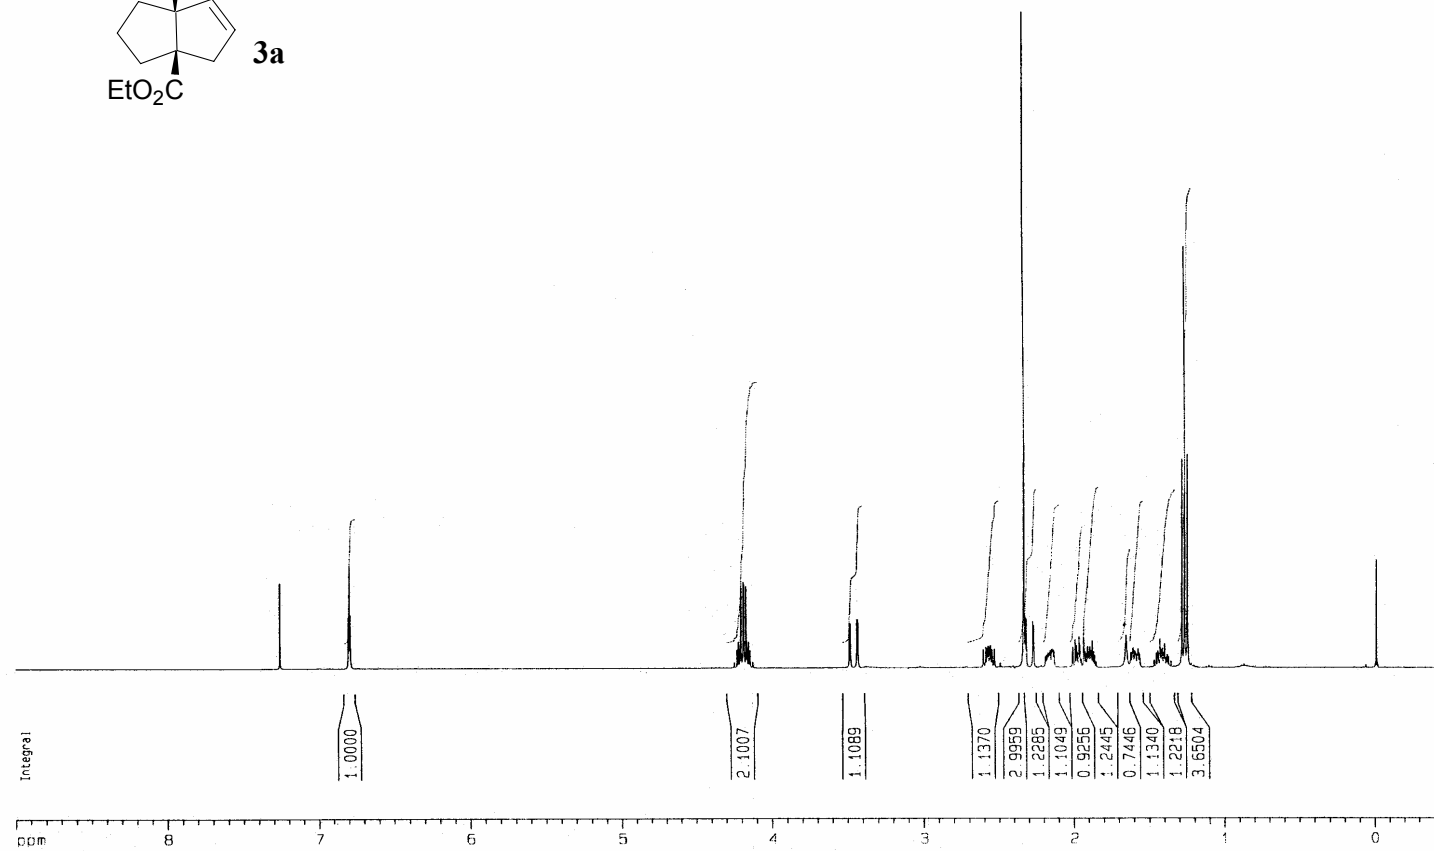

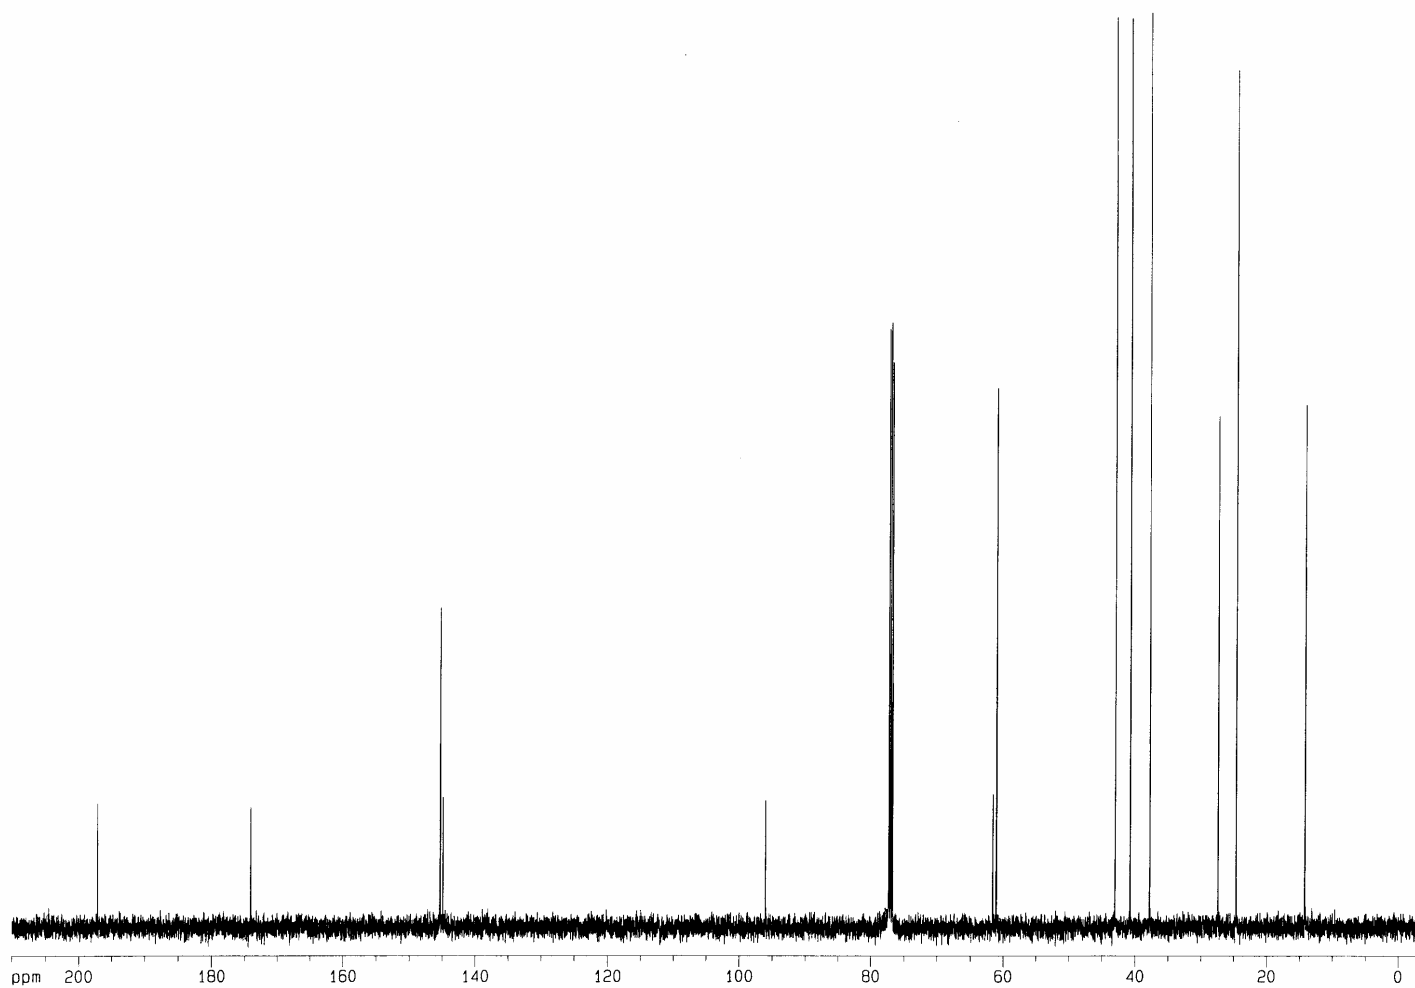

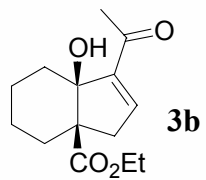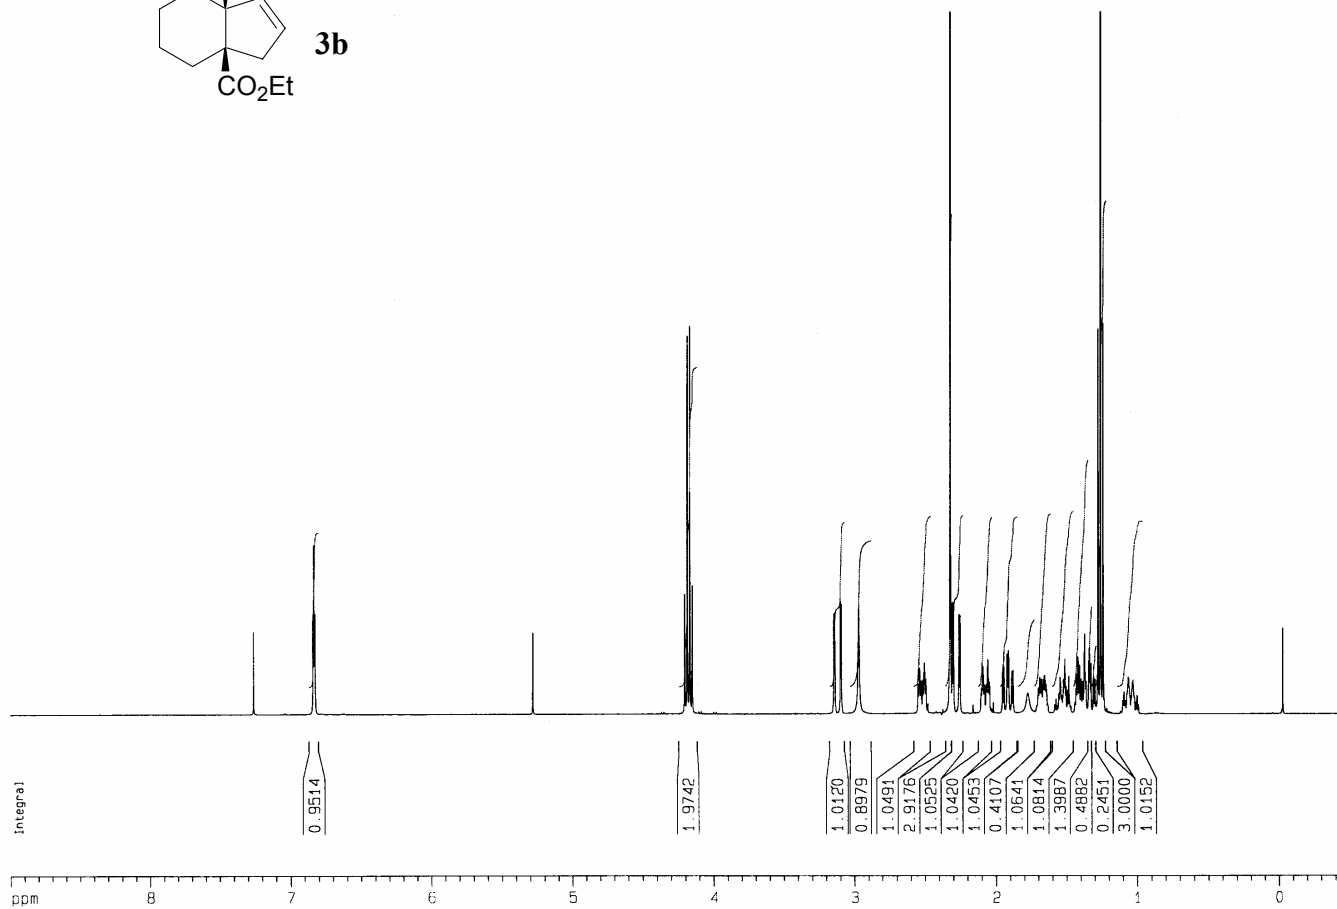

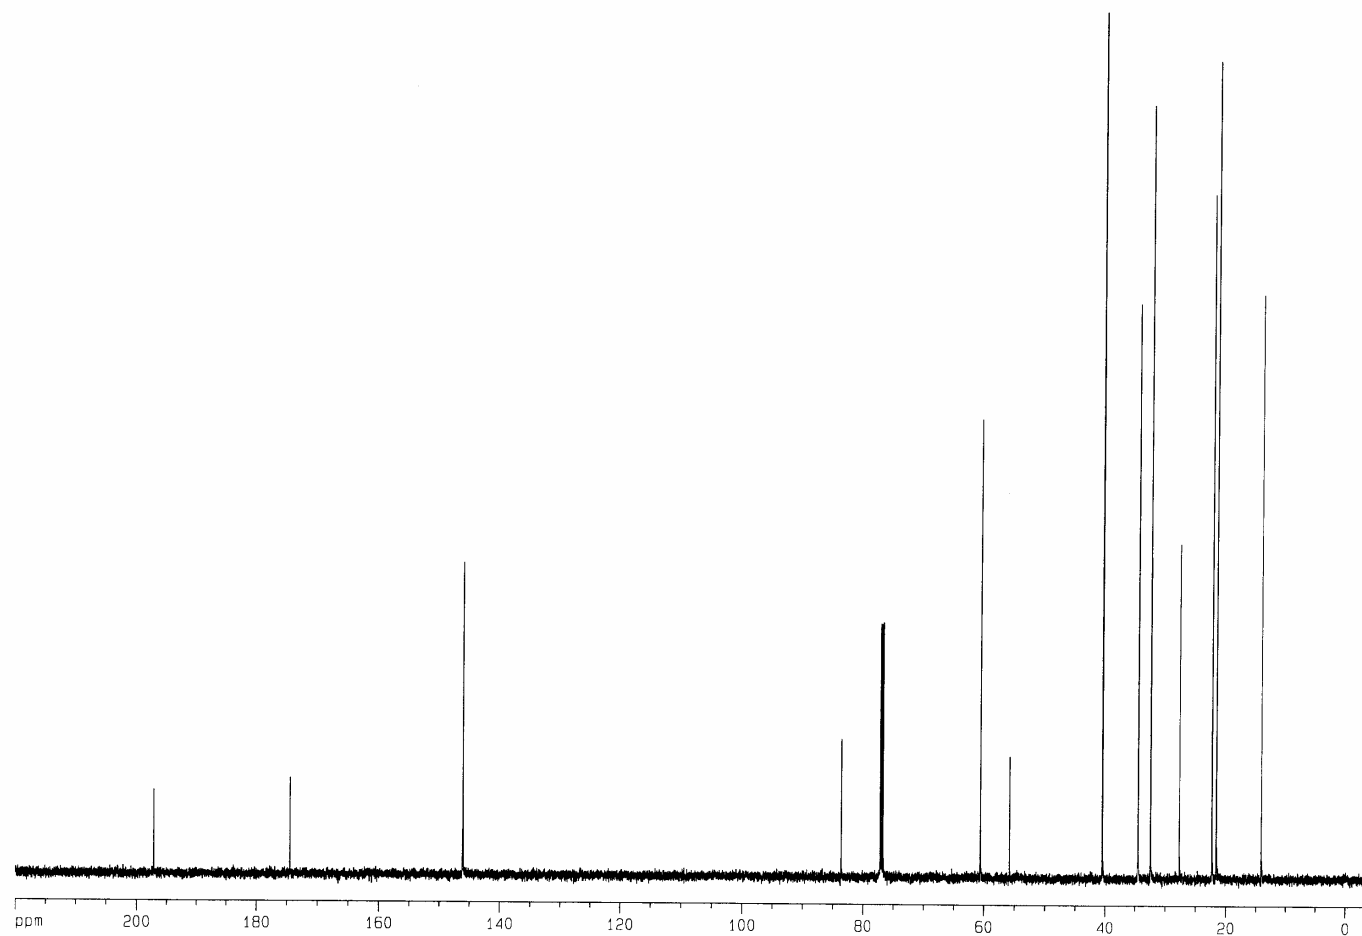

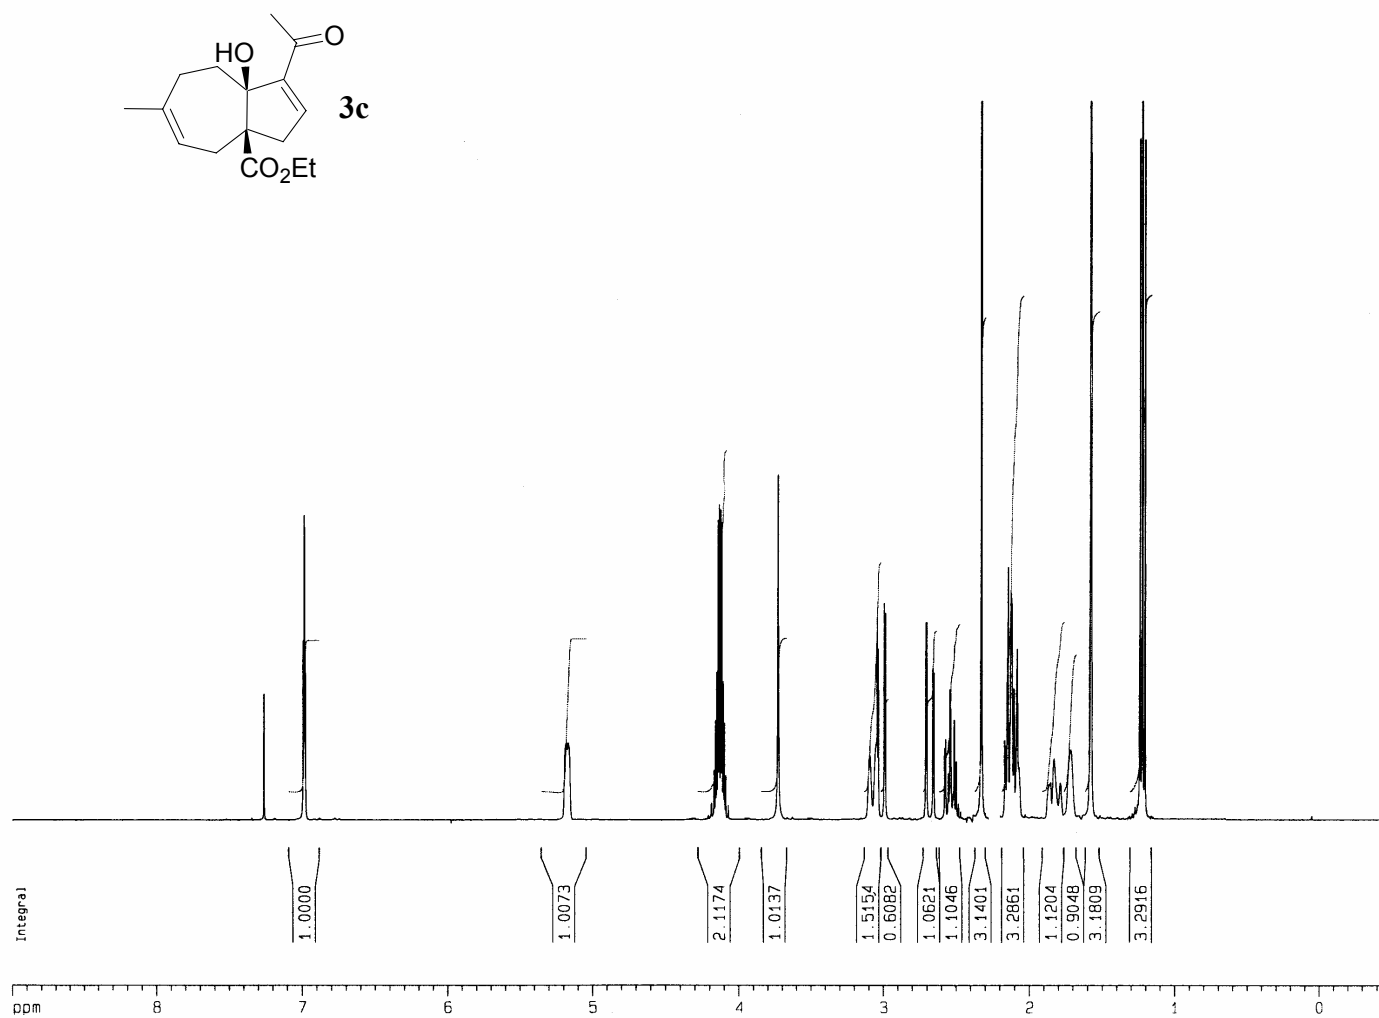

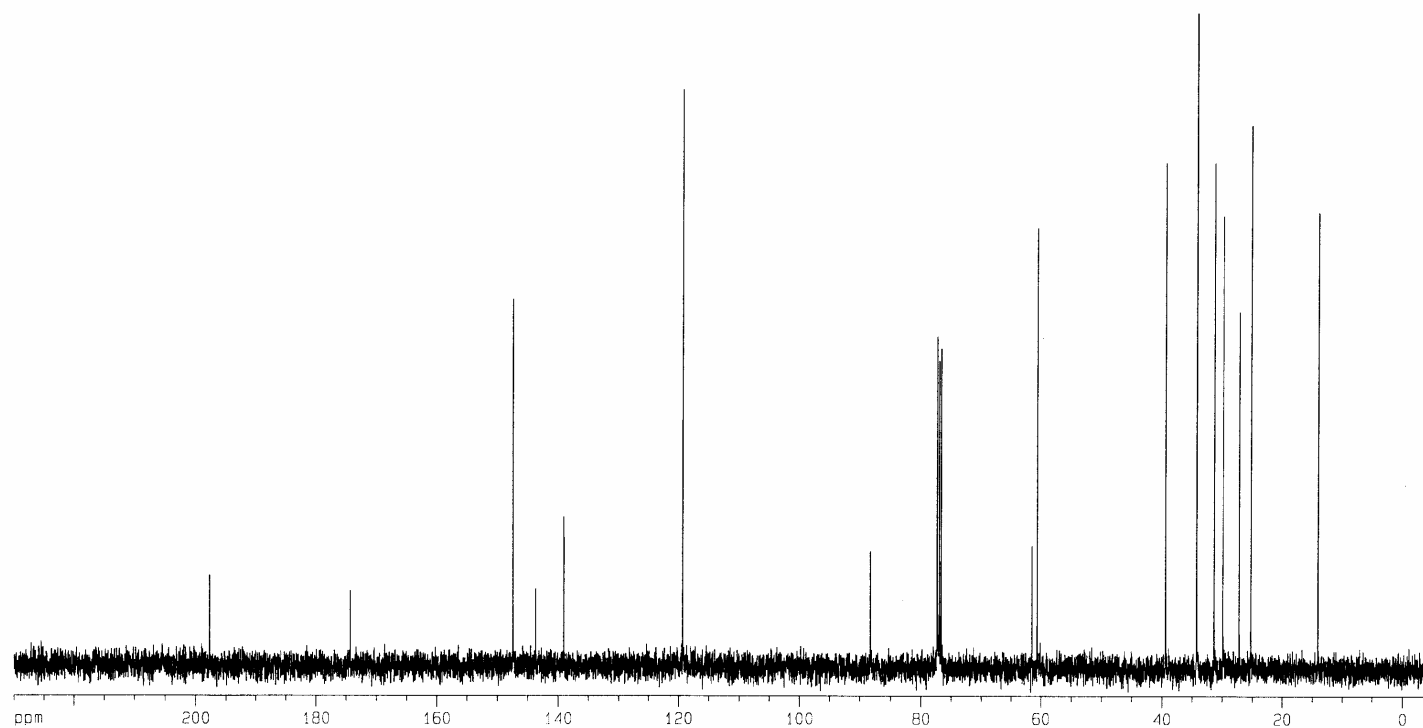

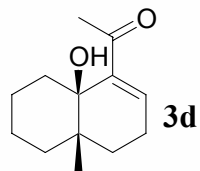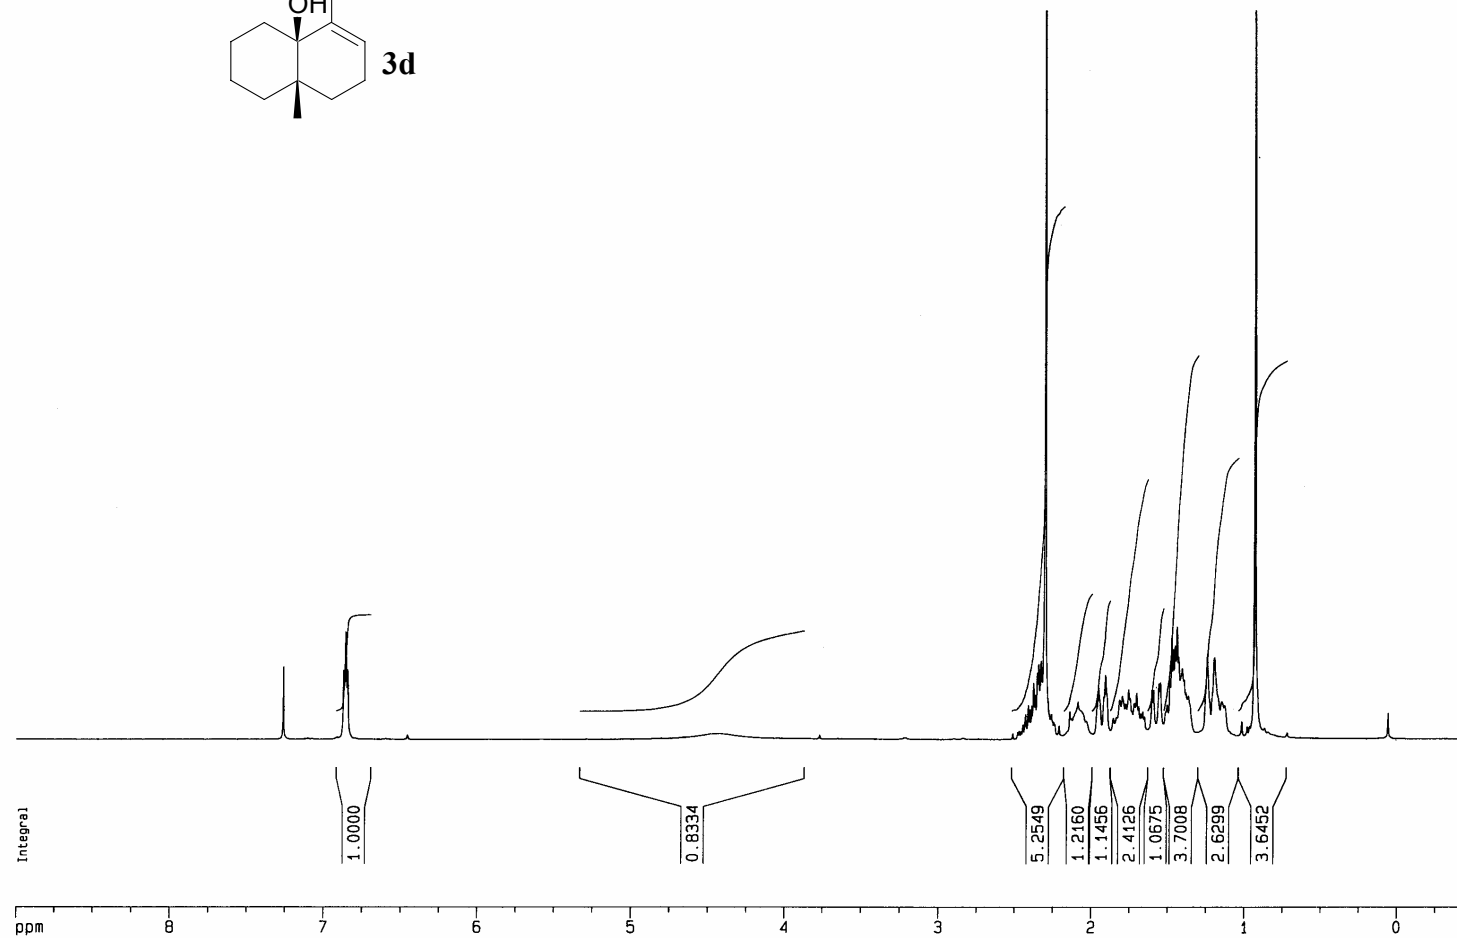

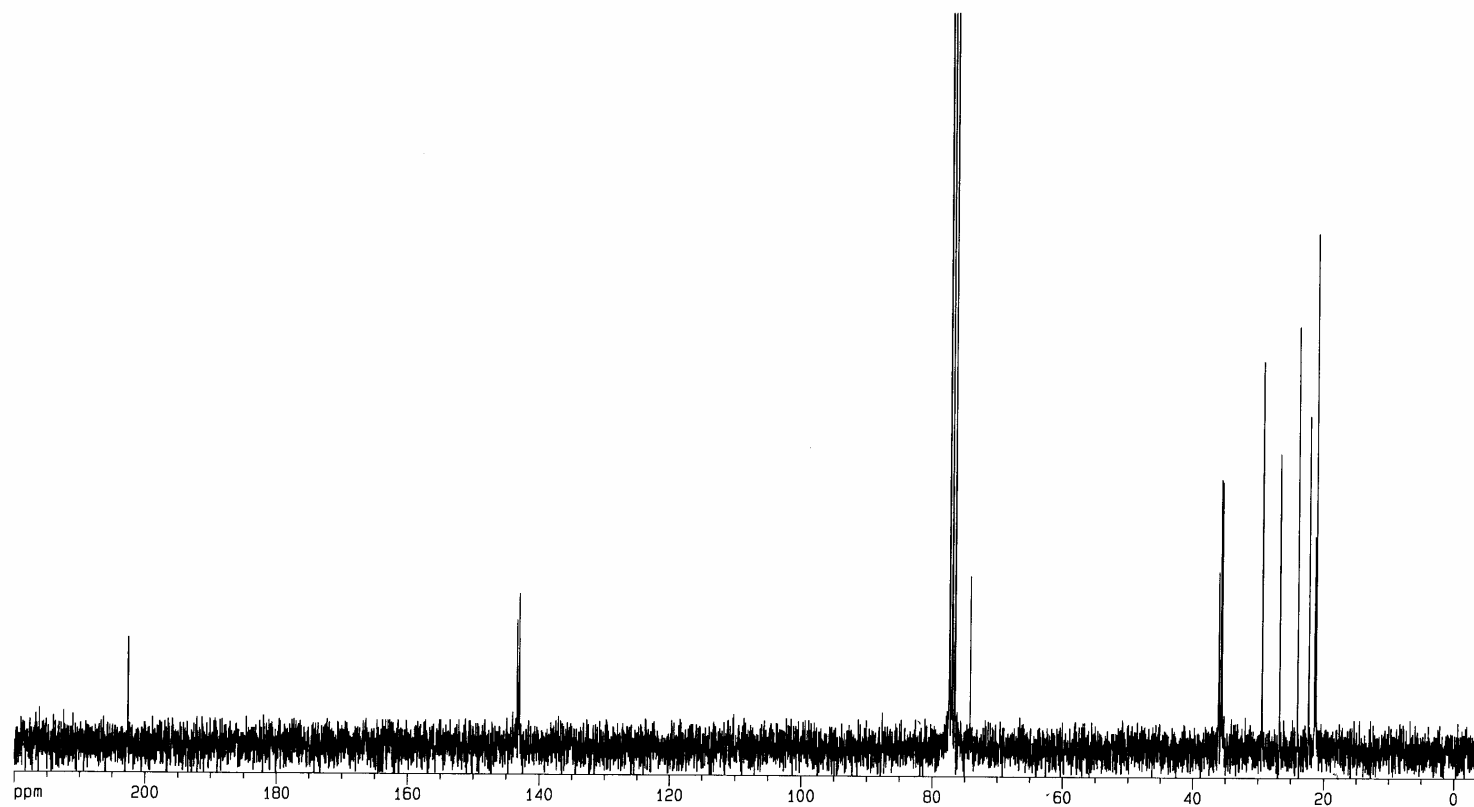



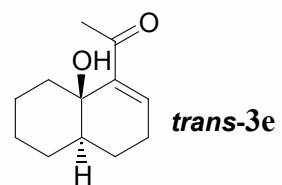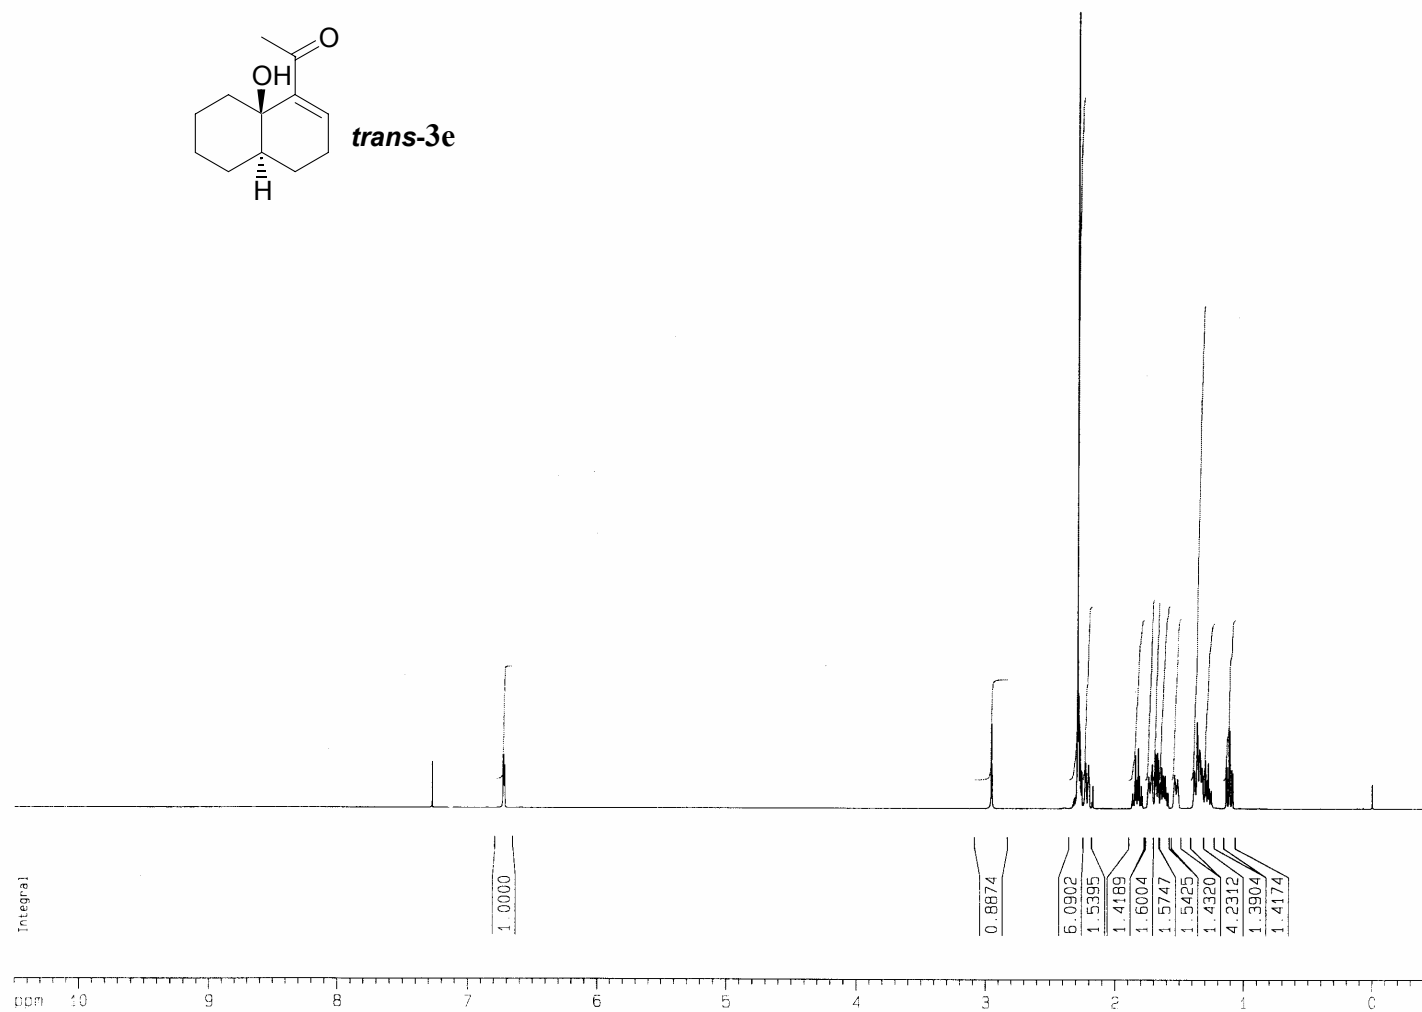

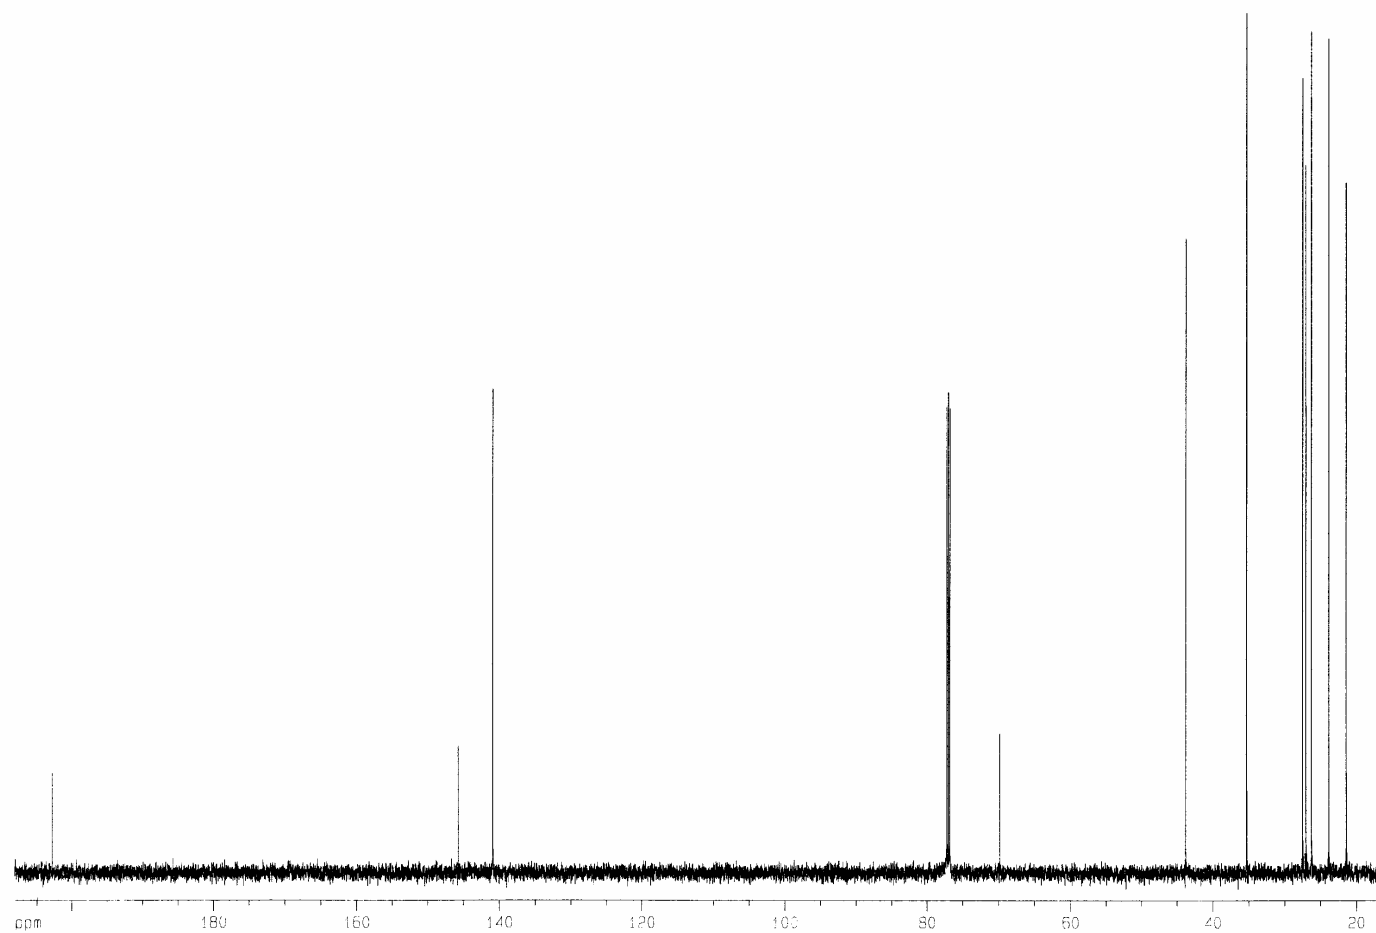

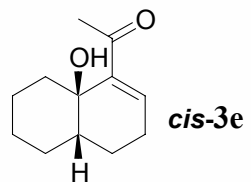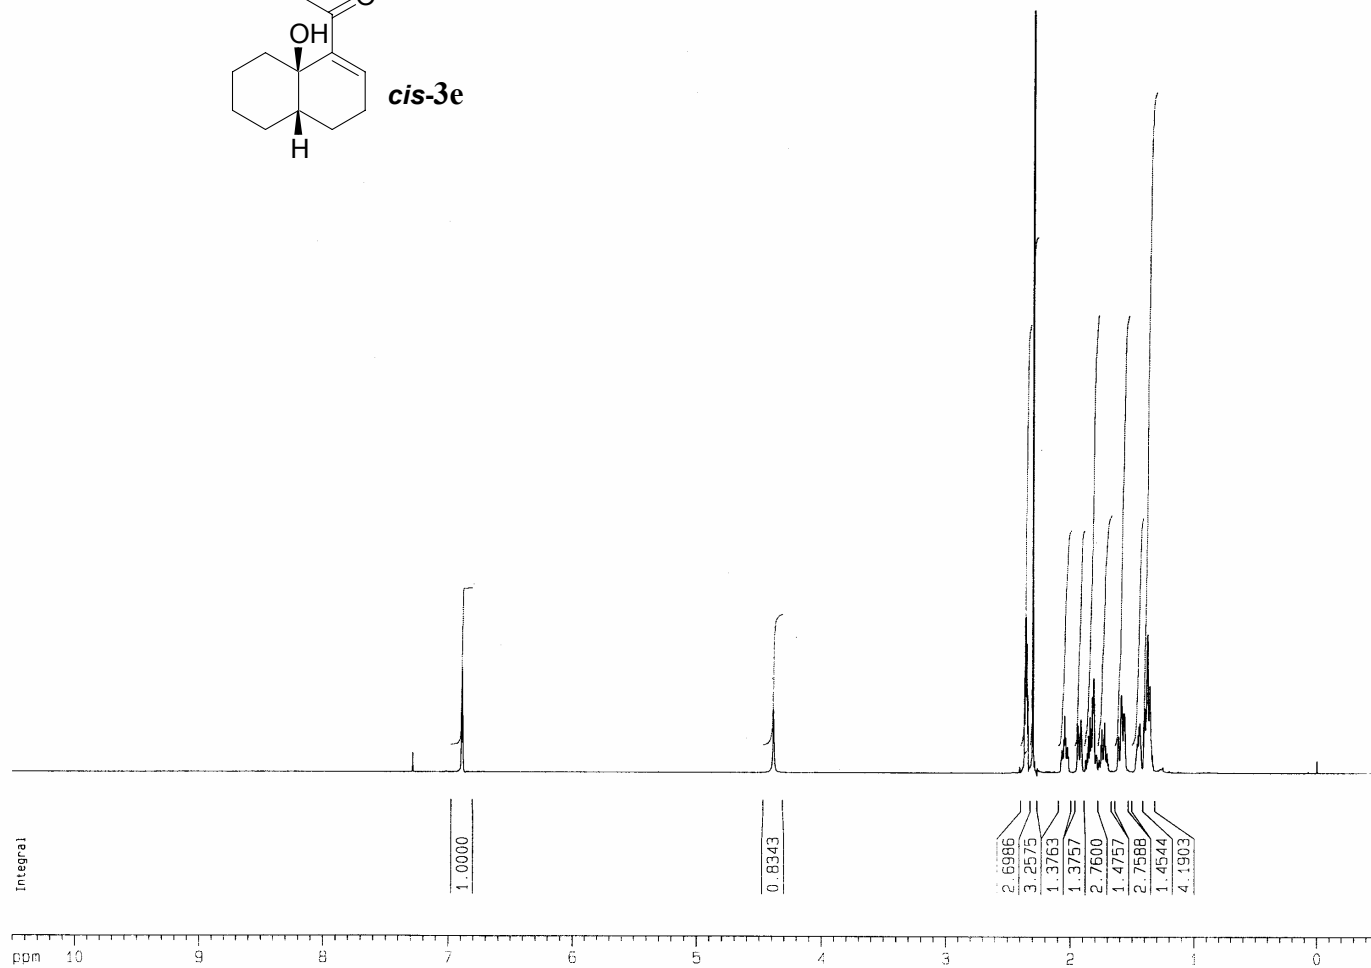

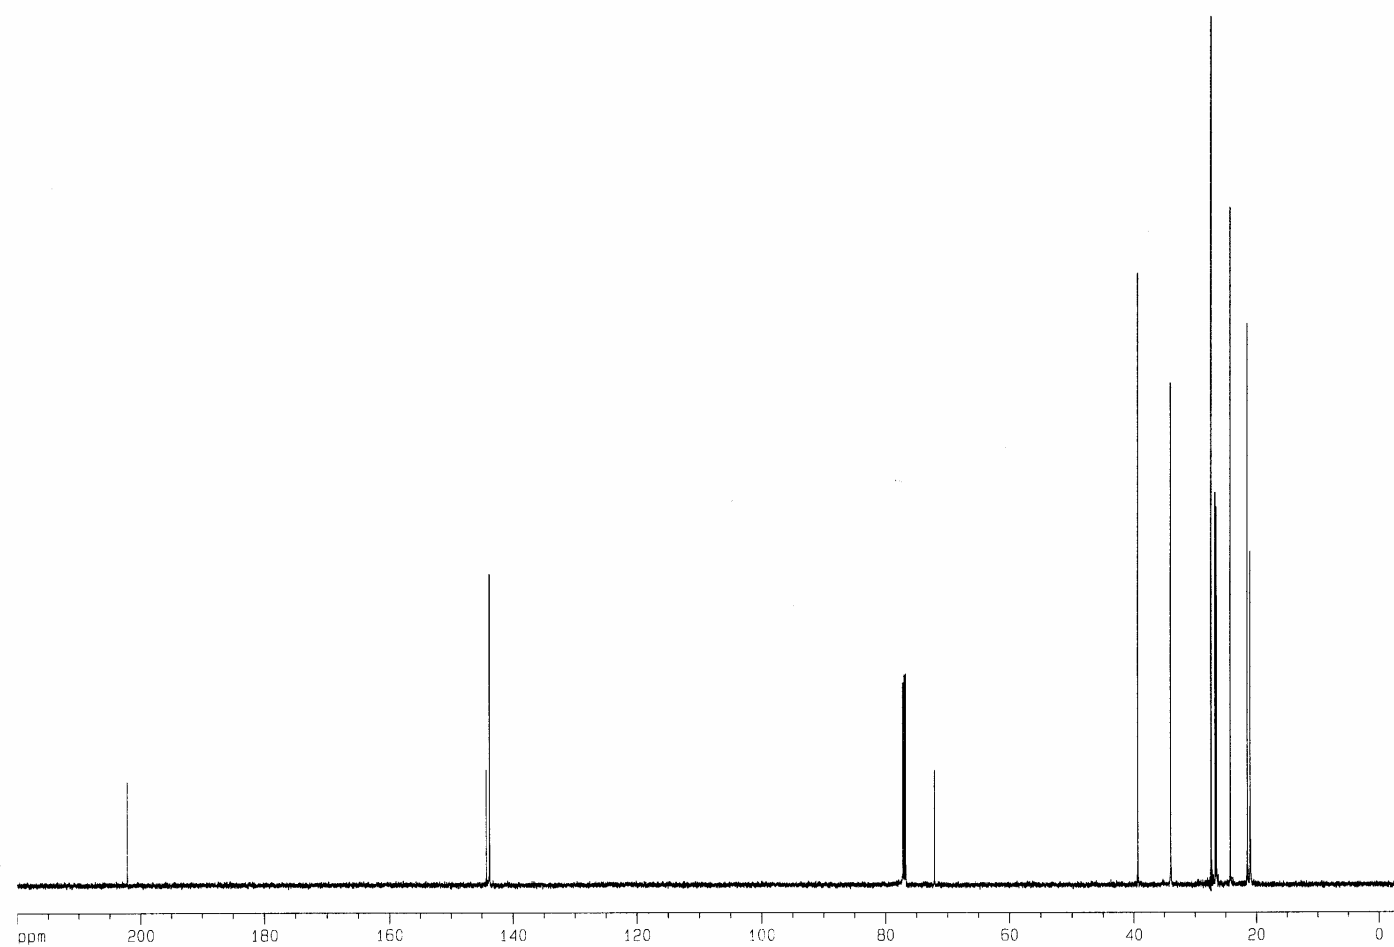

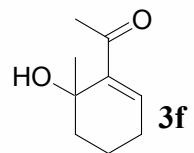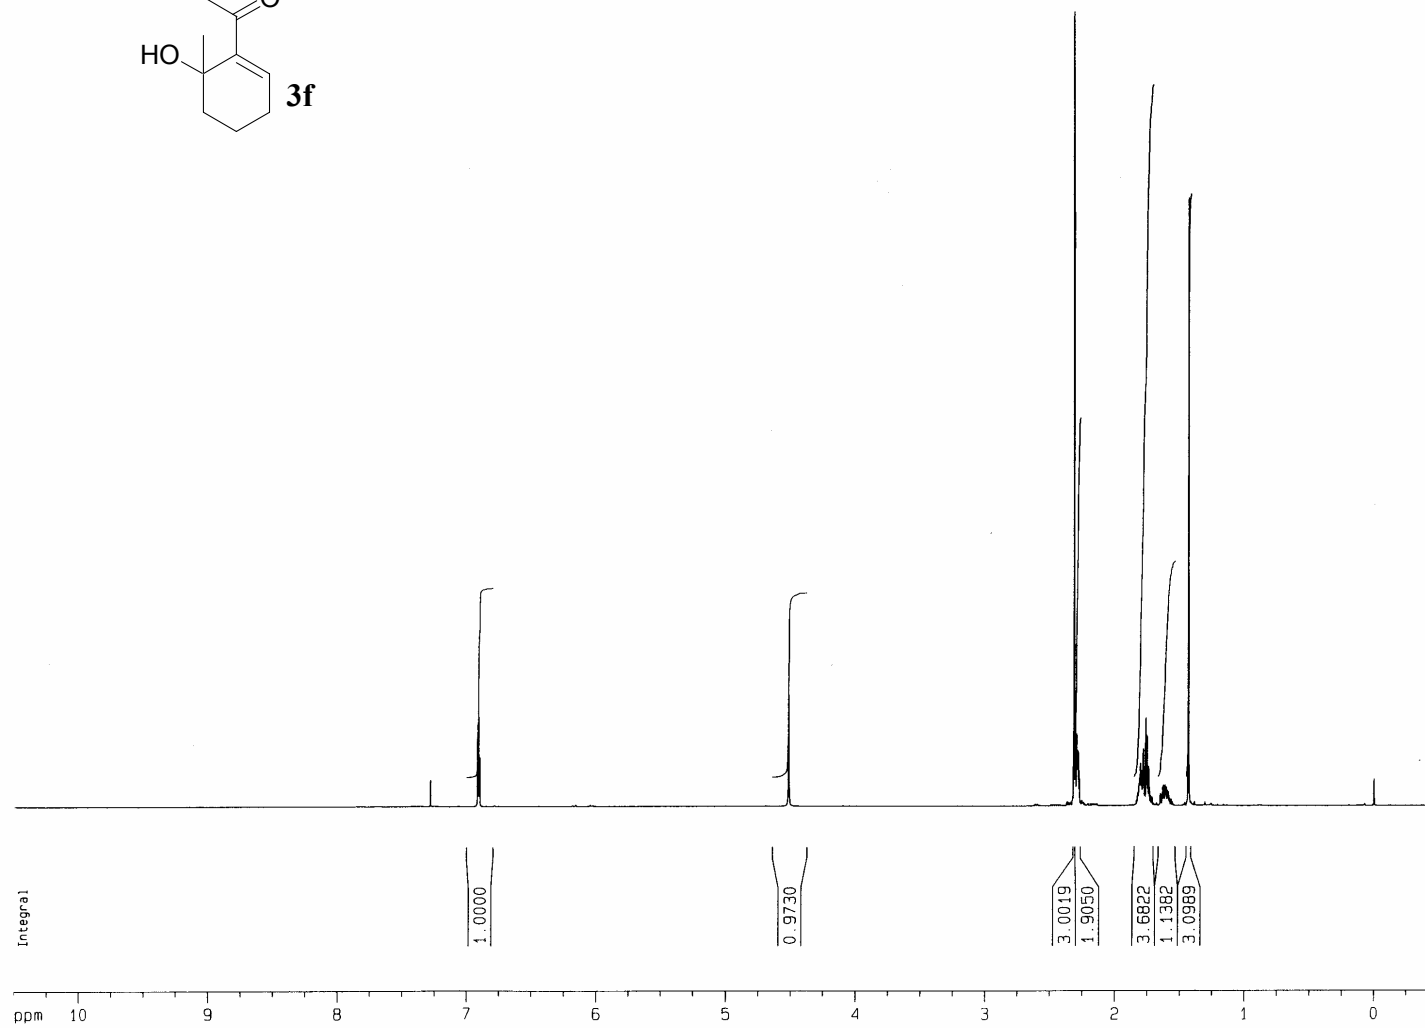

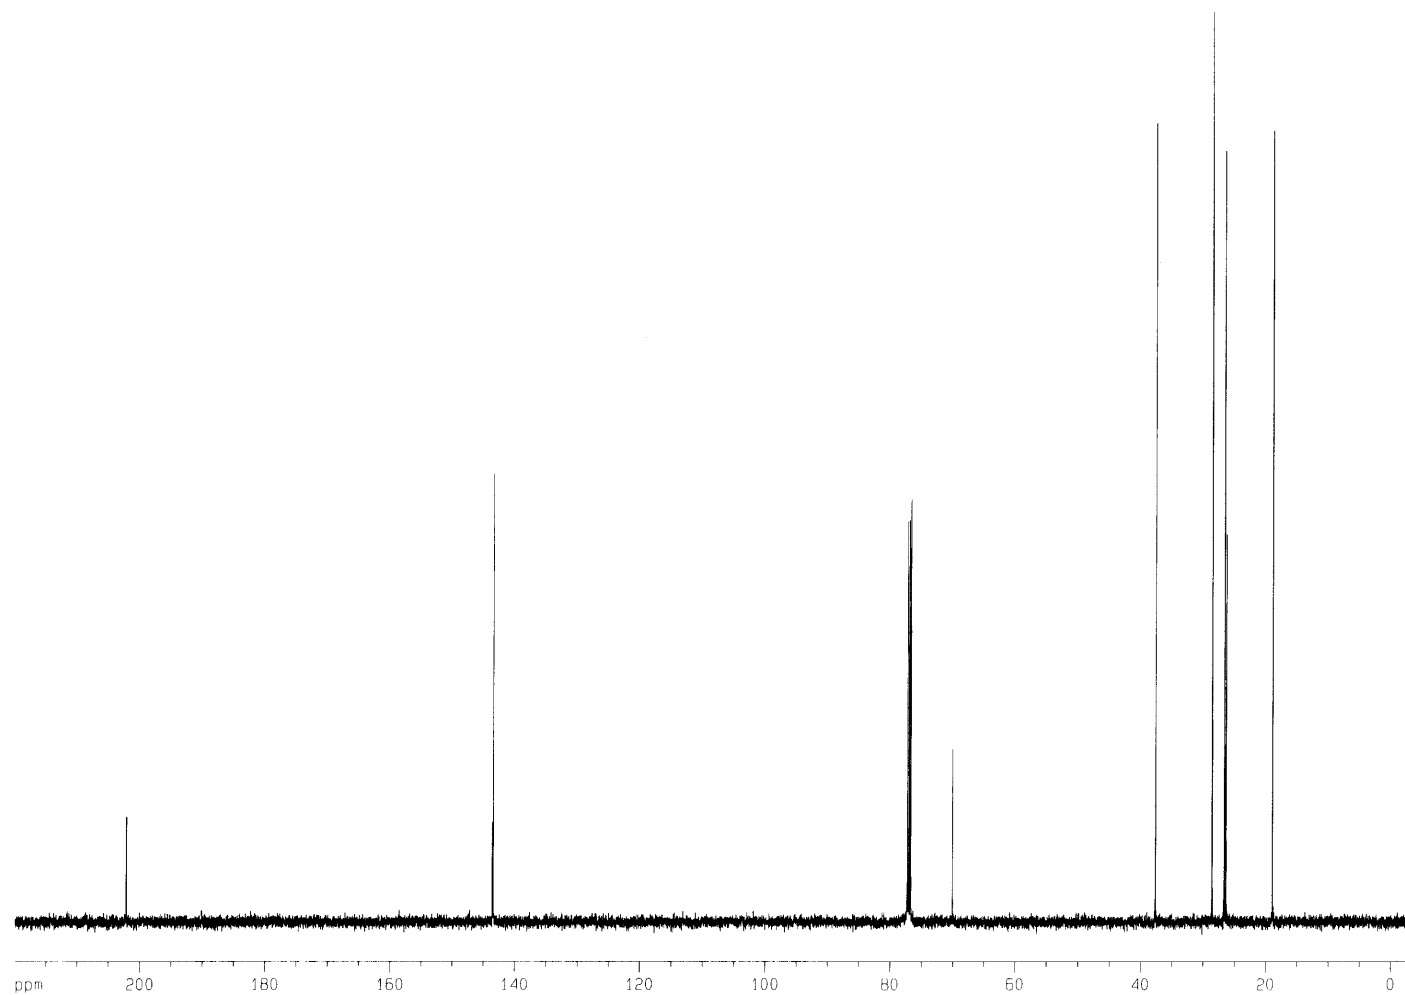

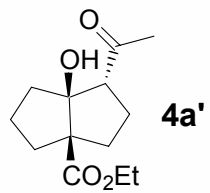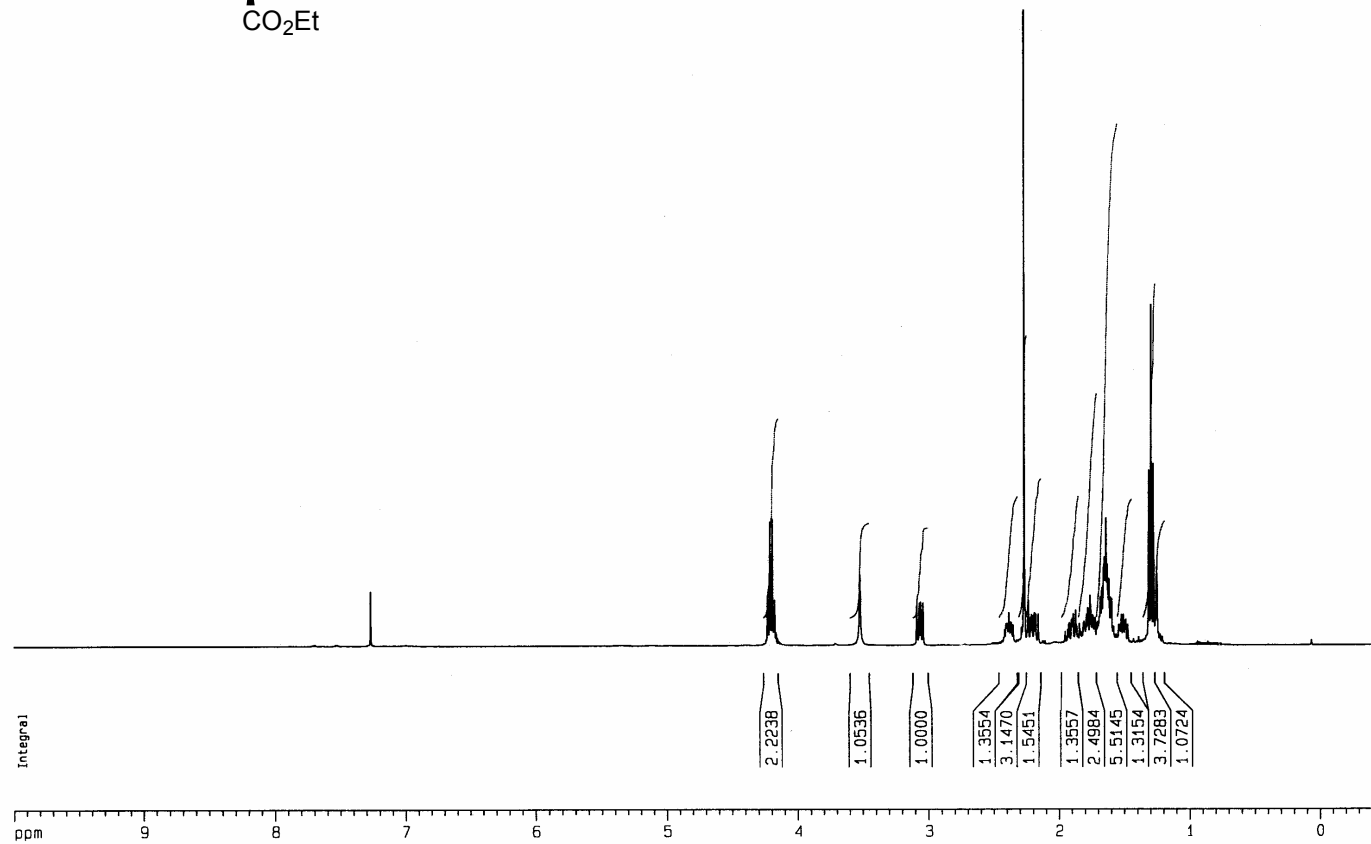

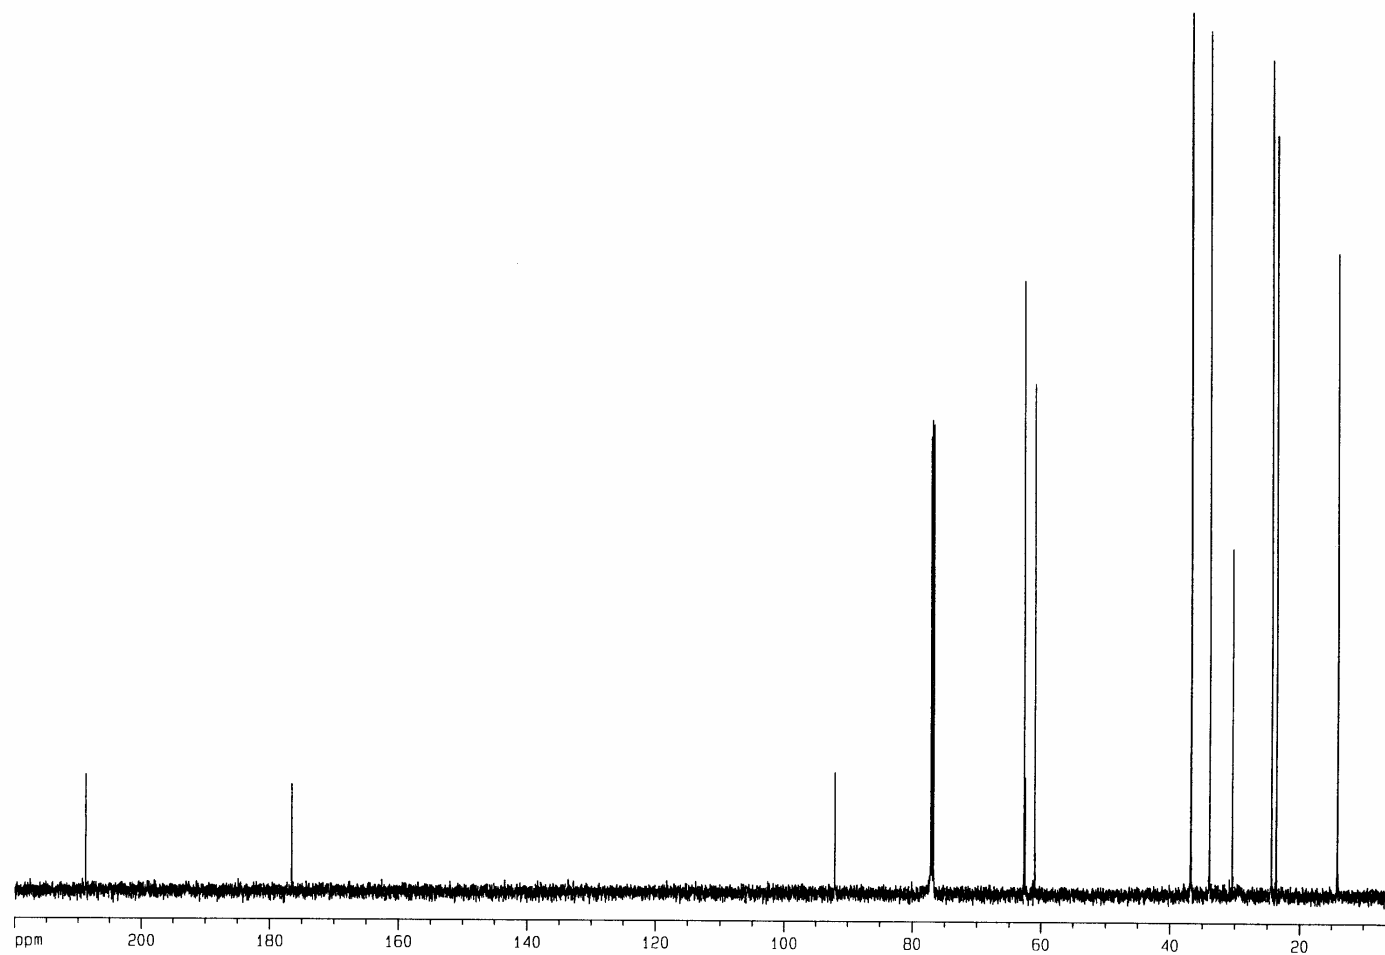



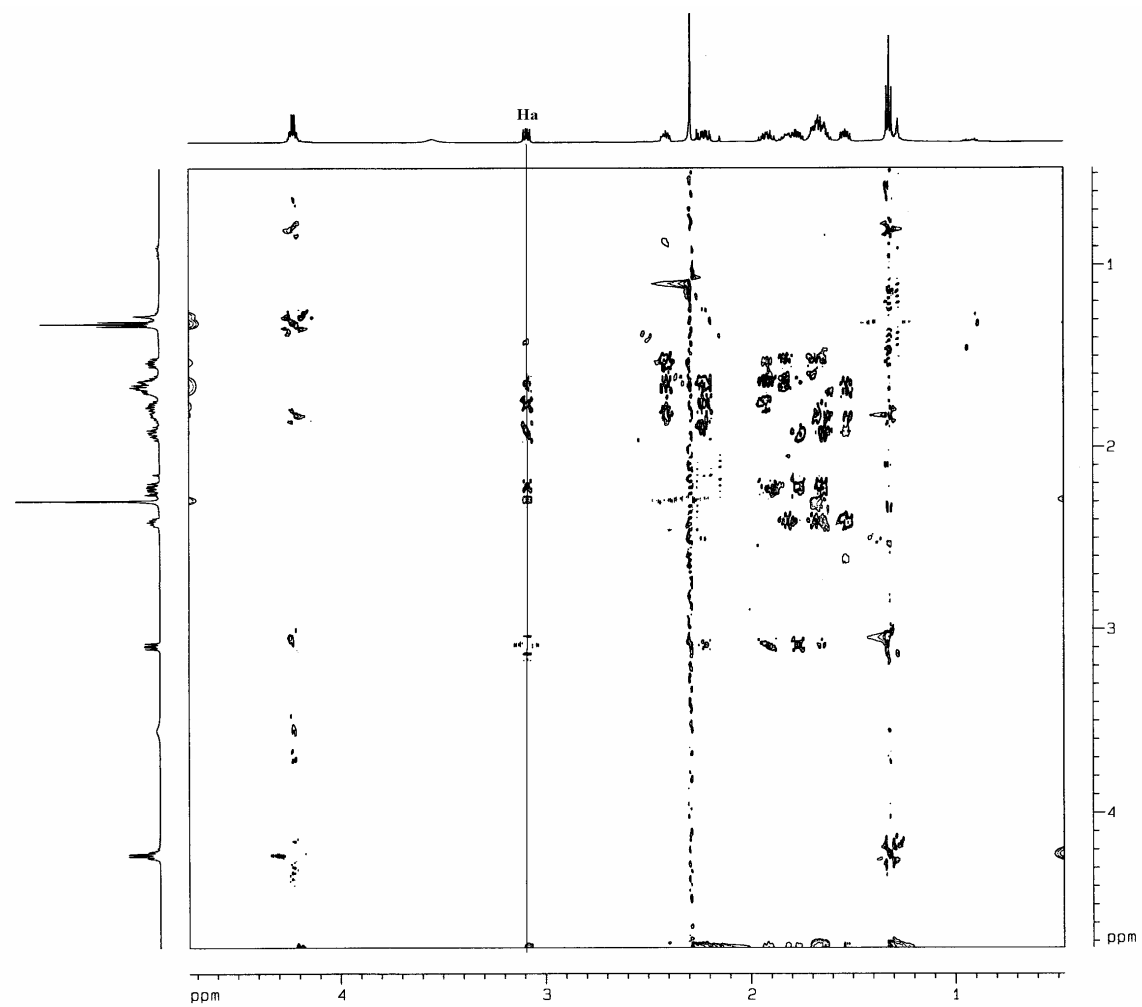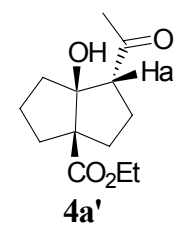

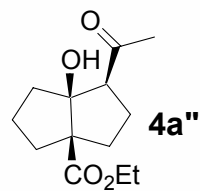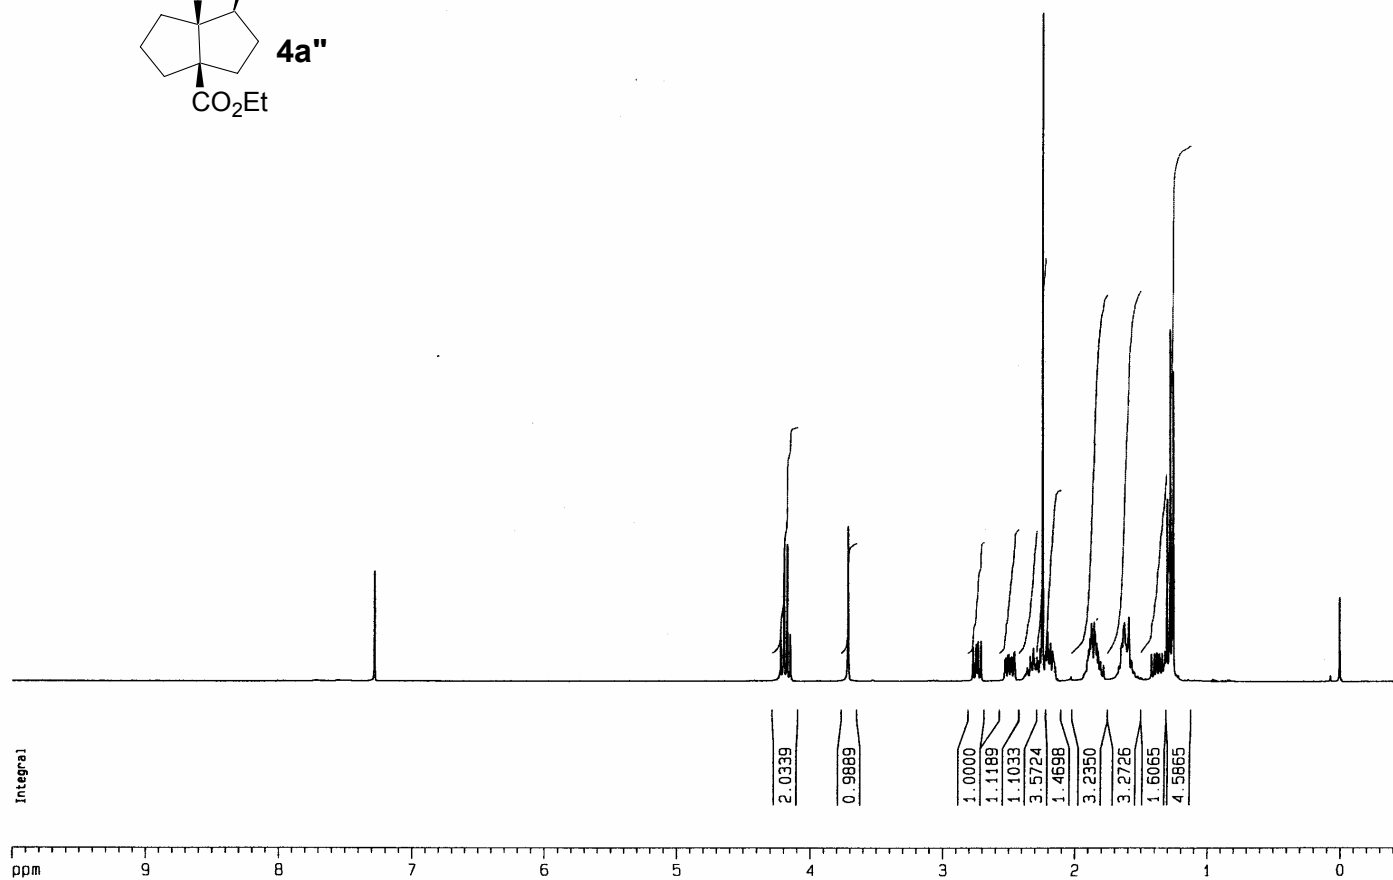

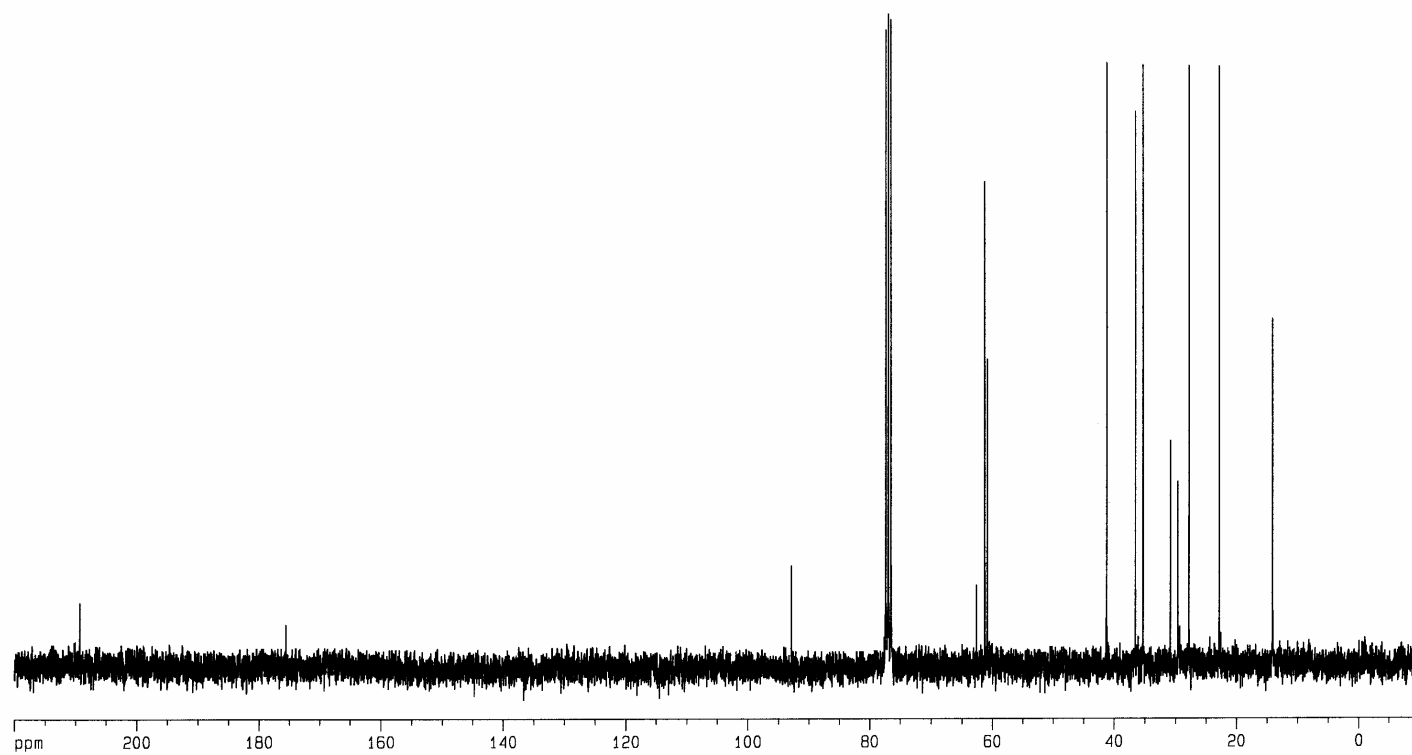

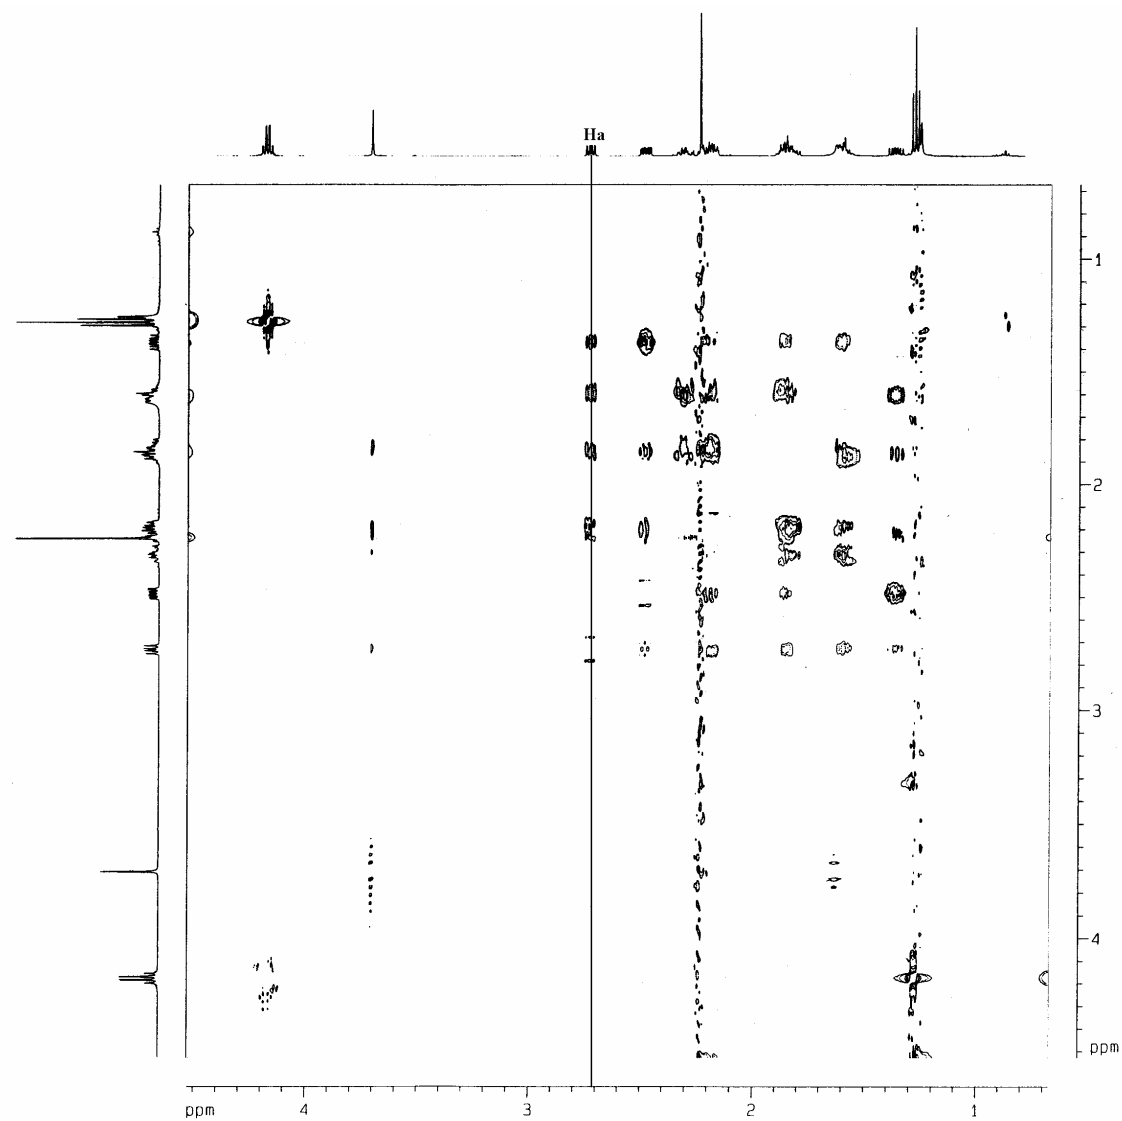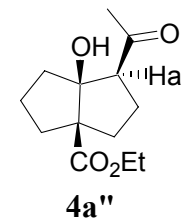

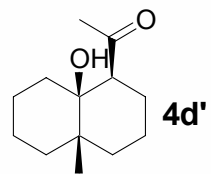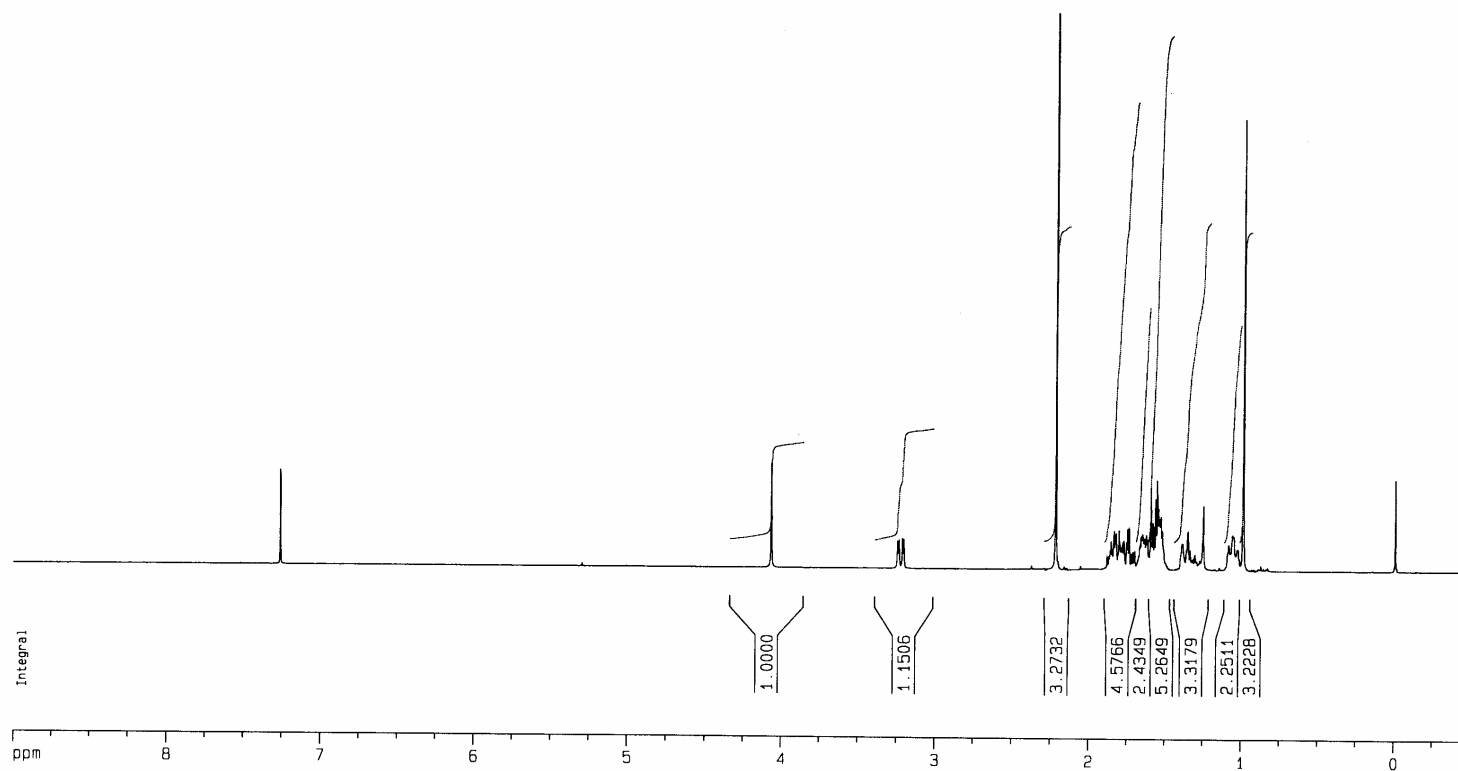

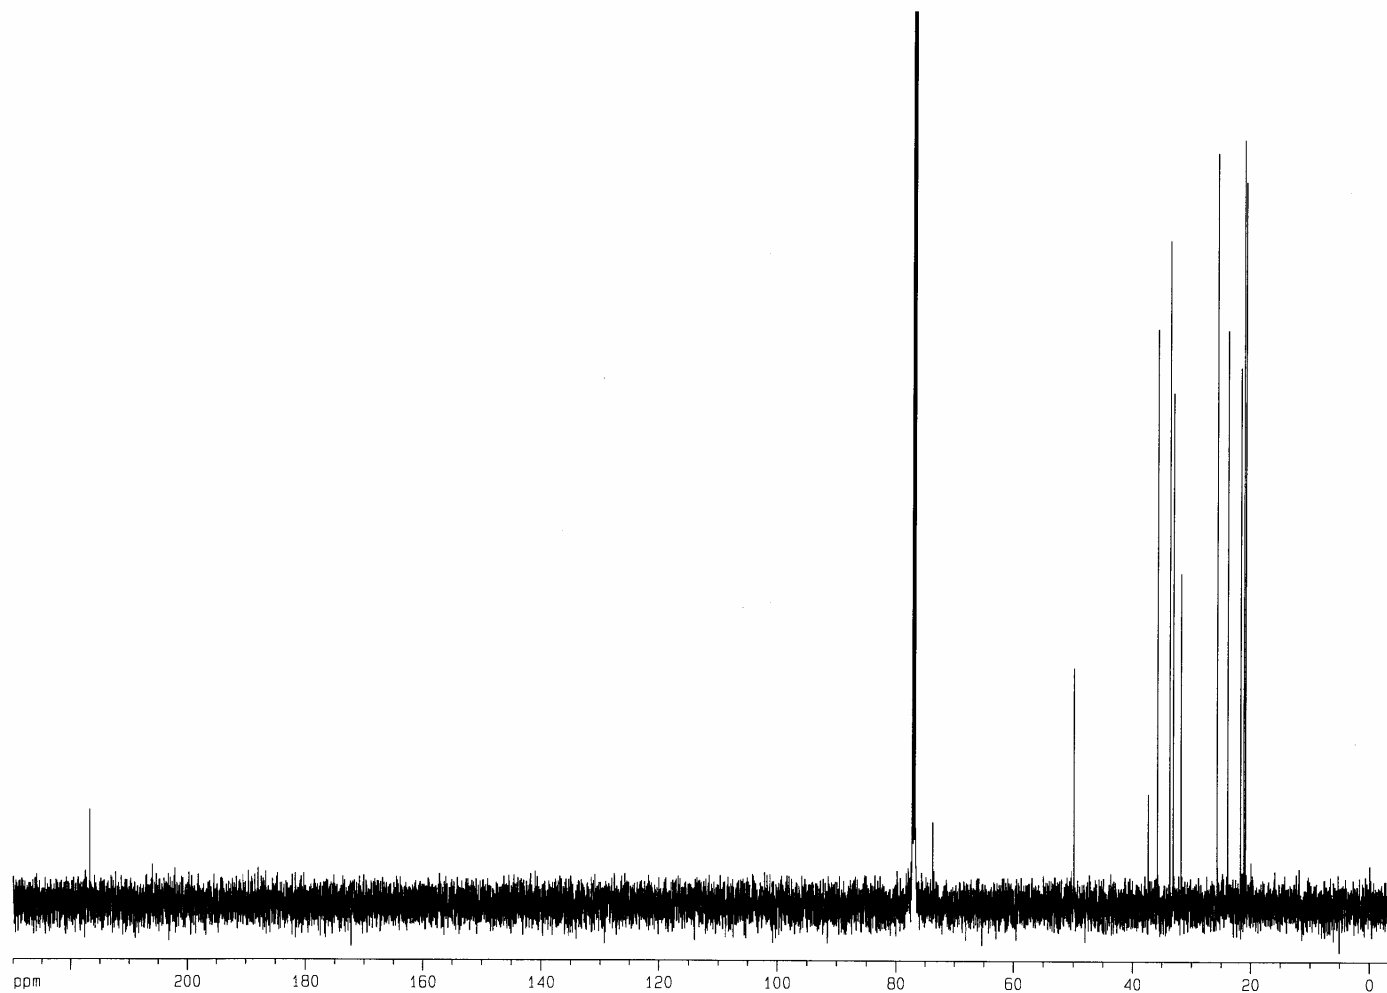

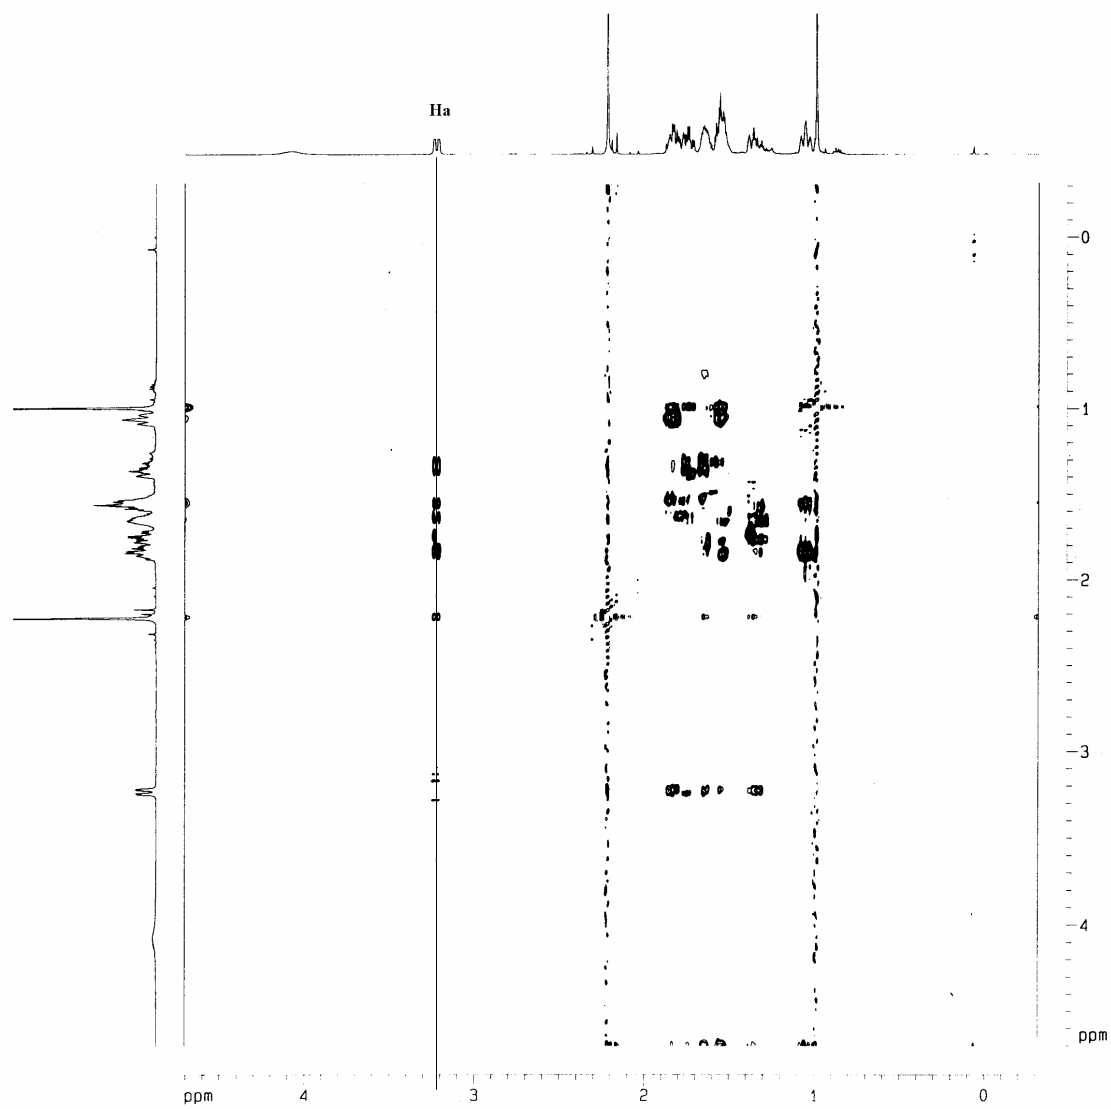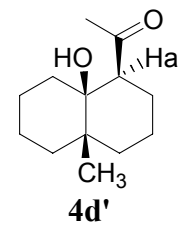

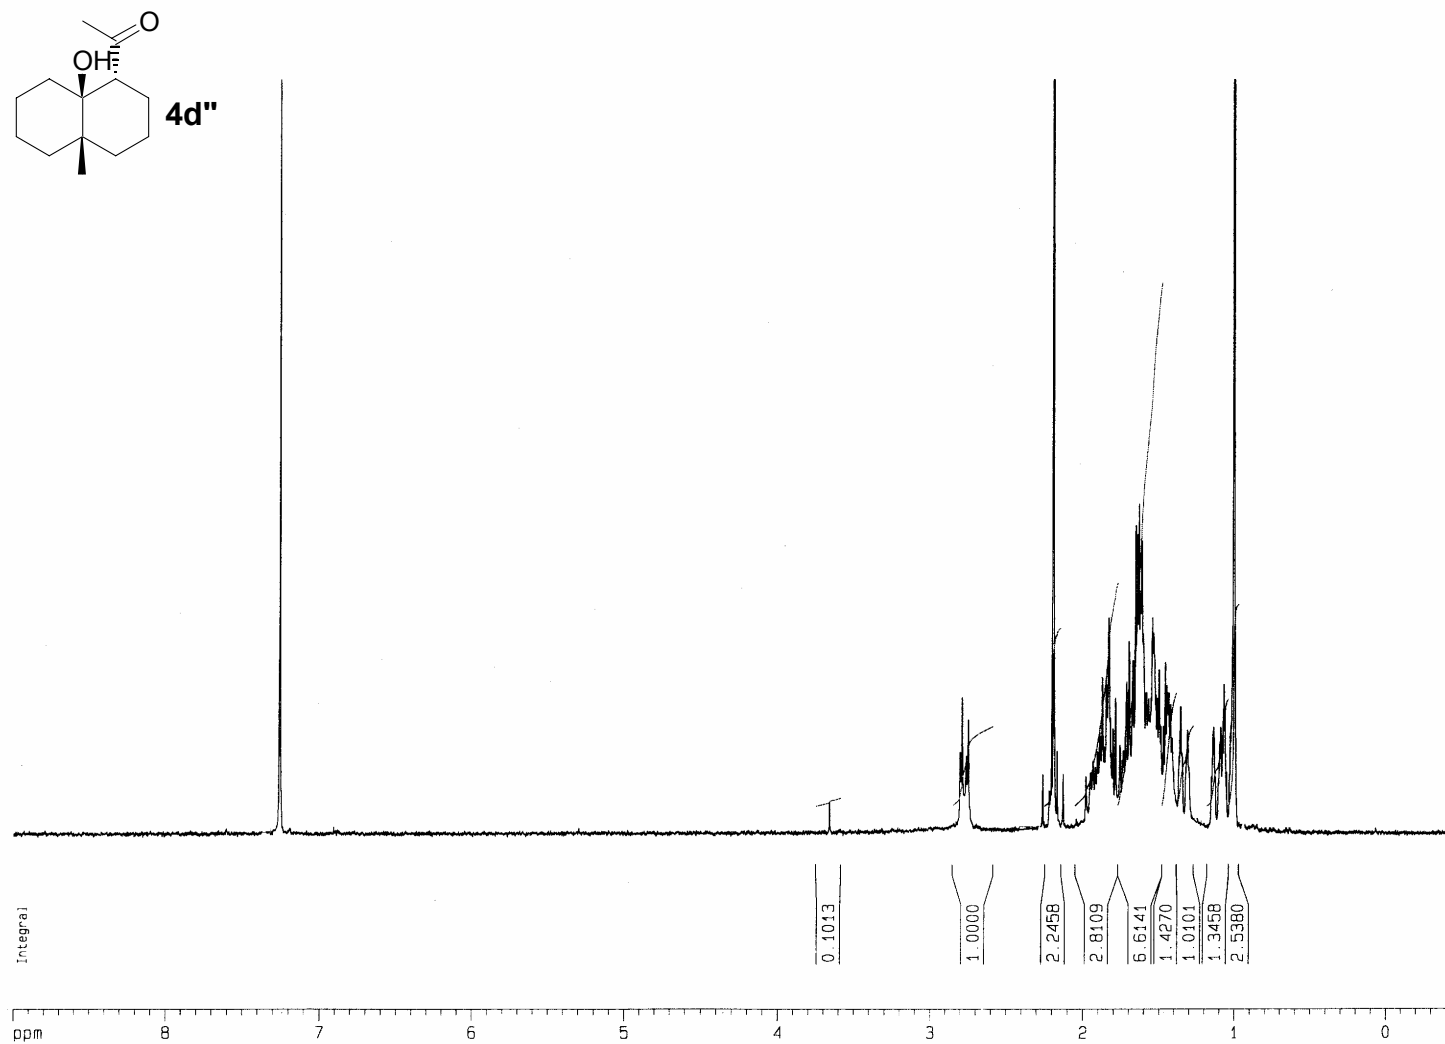



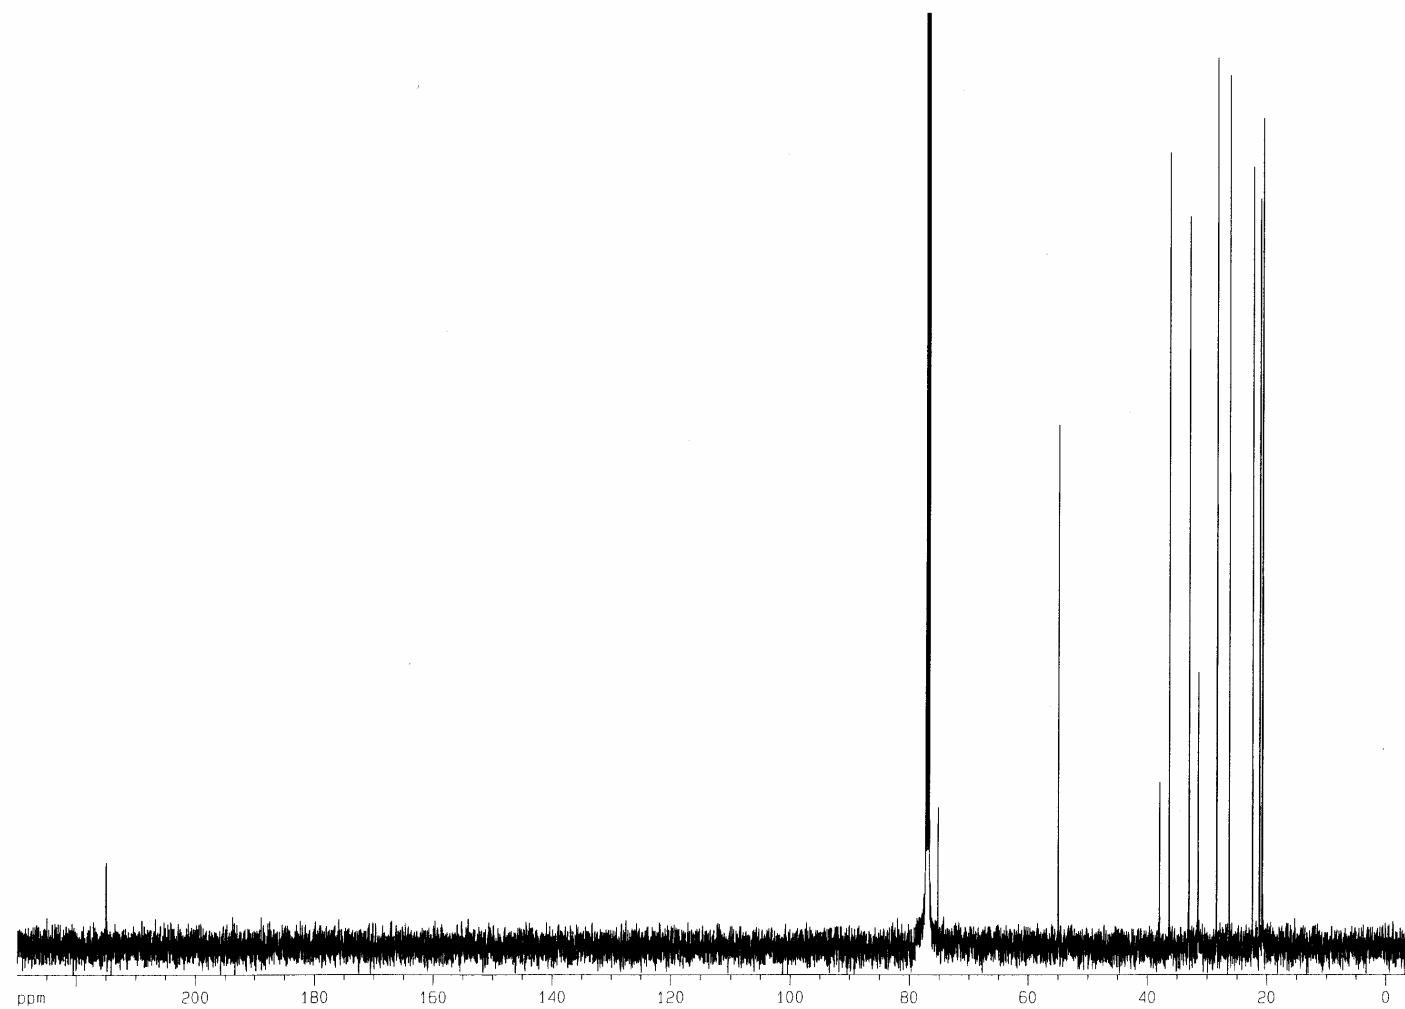

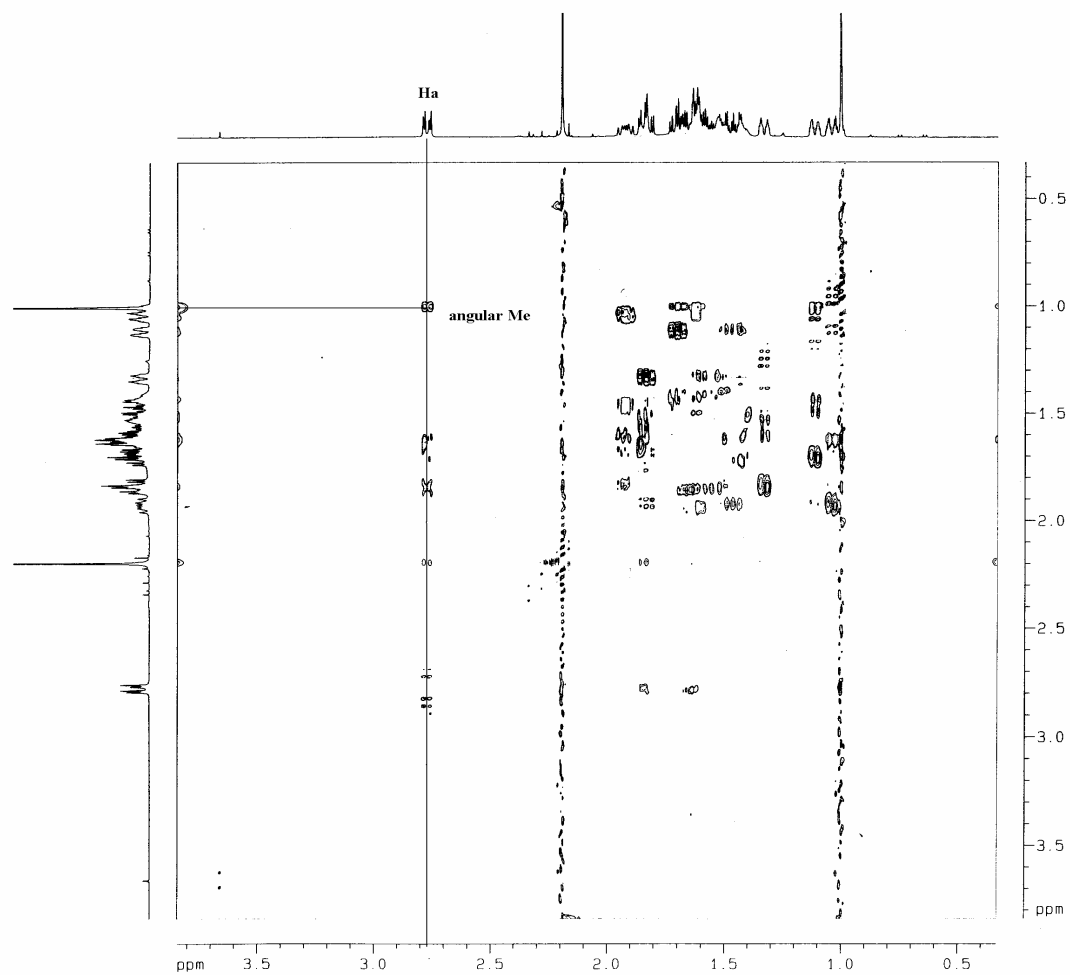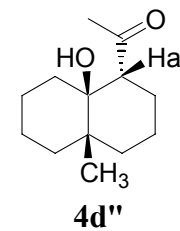

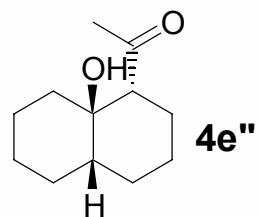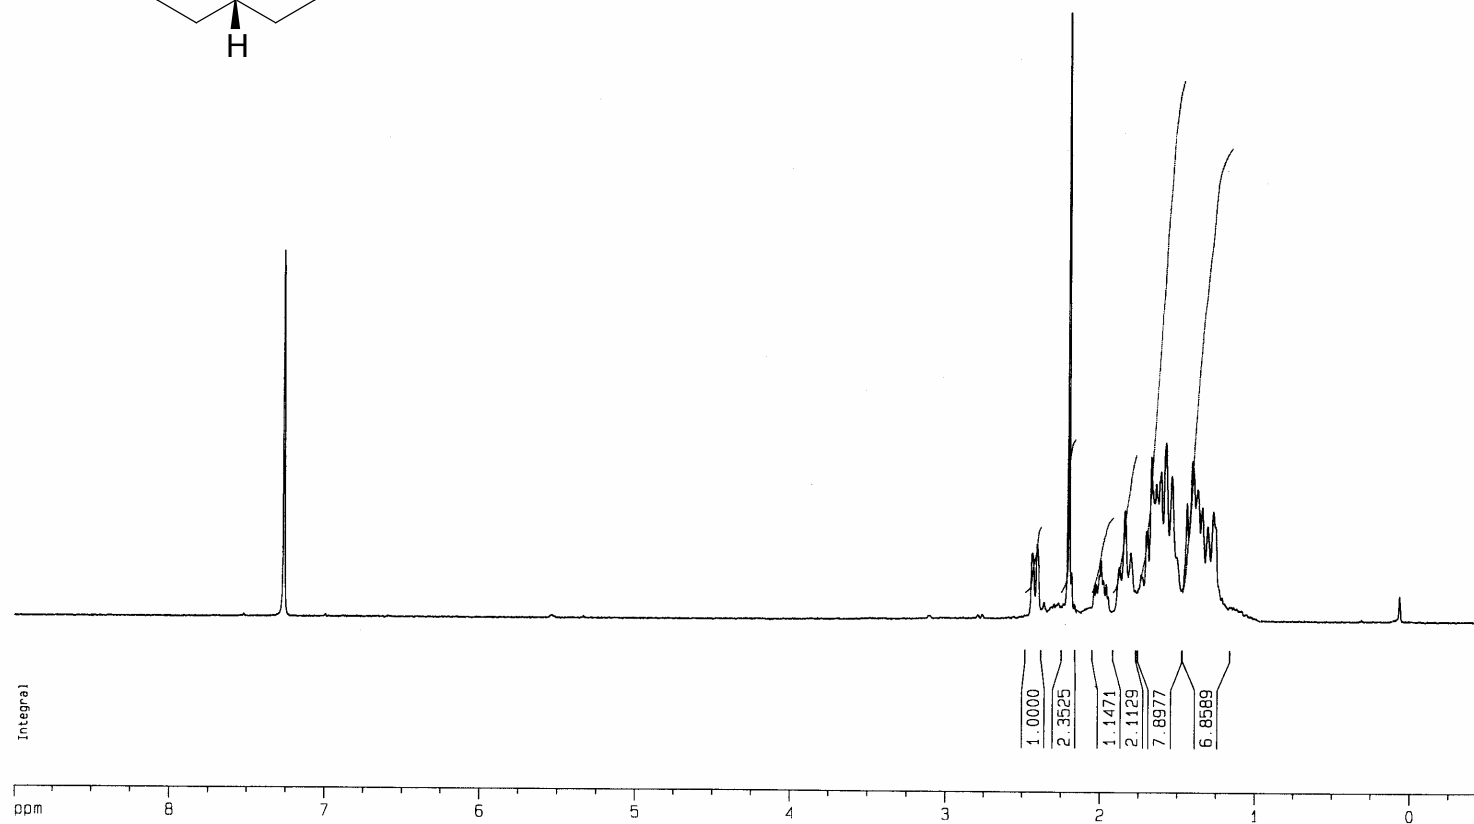

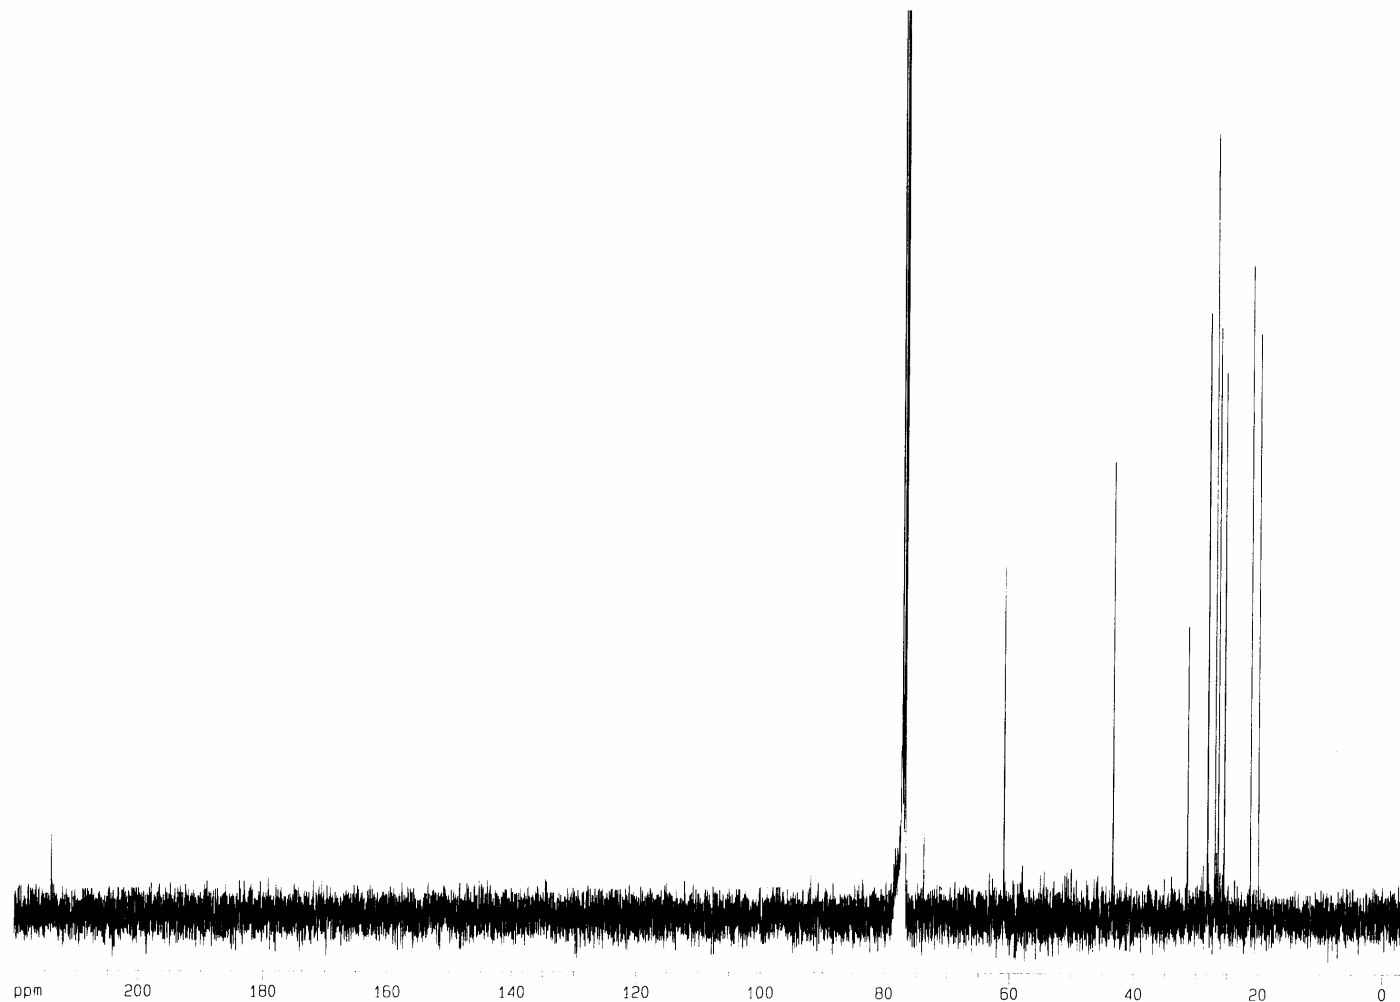

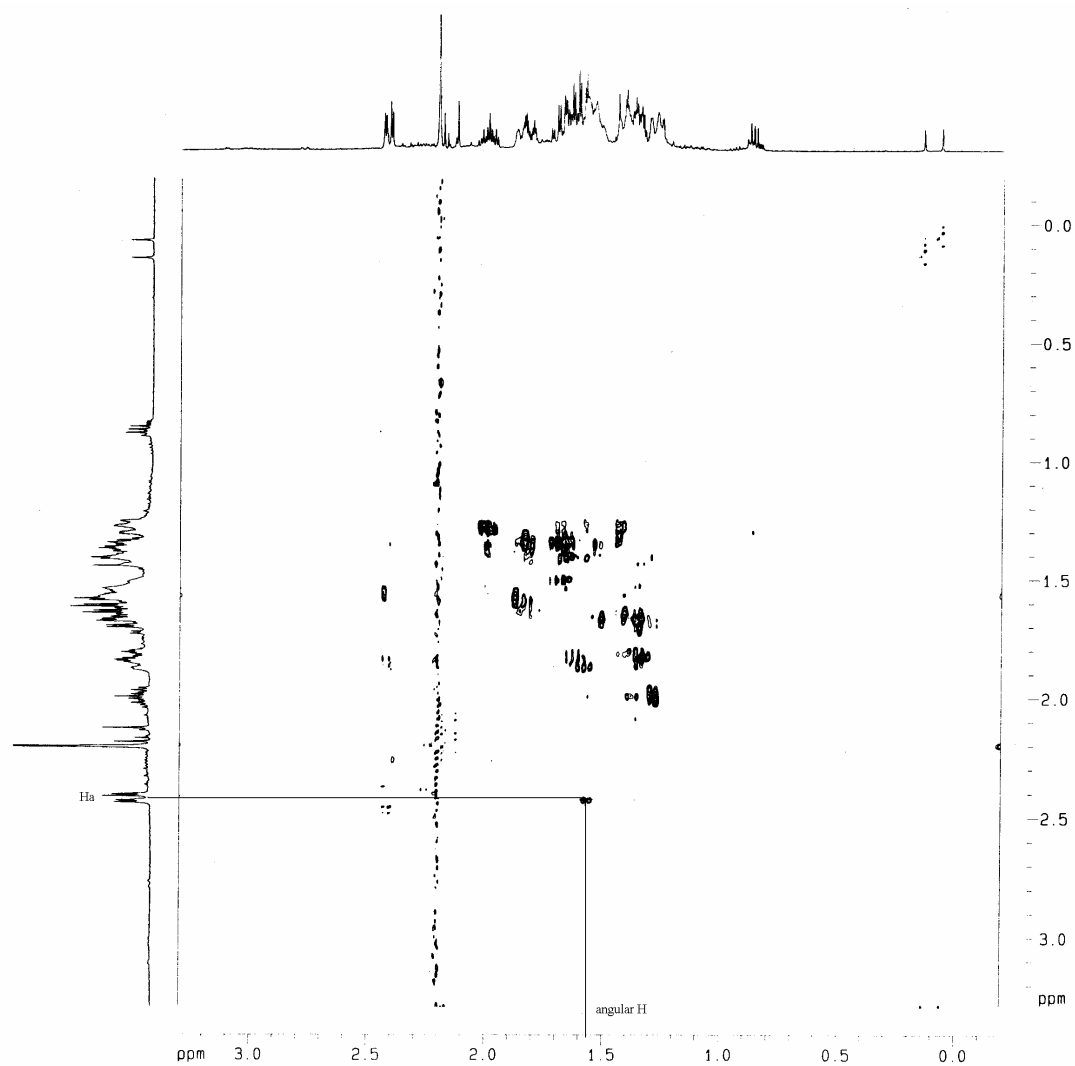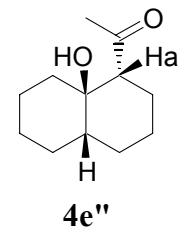

ORTEP DIAGRAM FOR COMPOUND **3b**

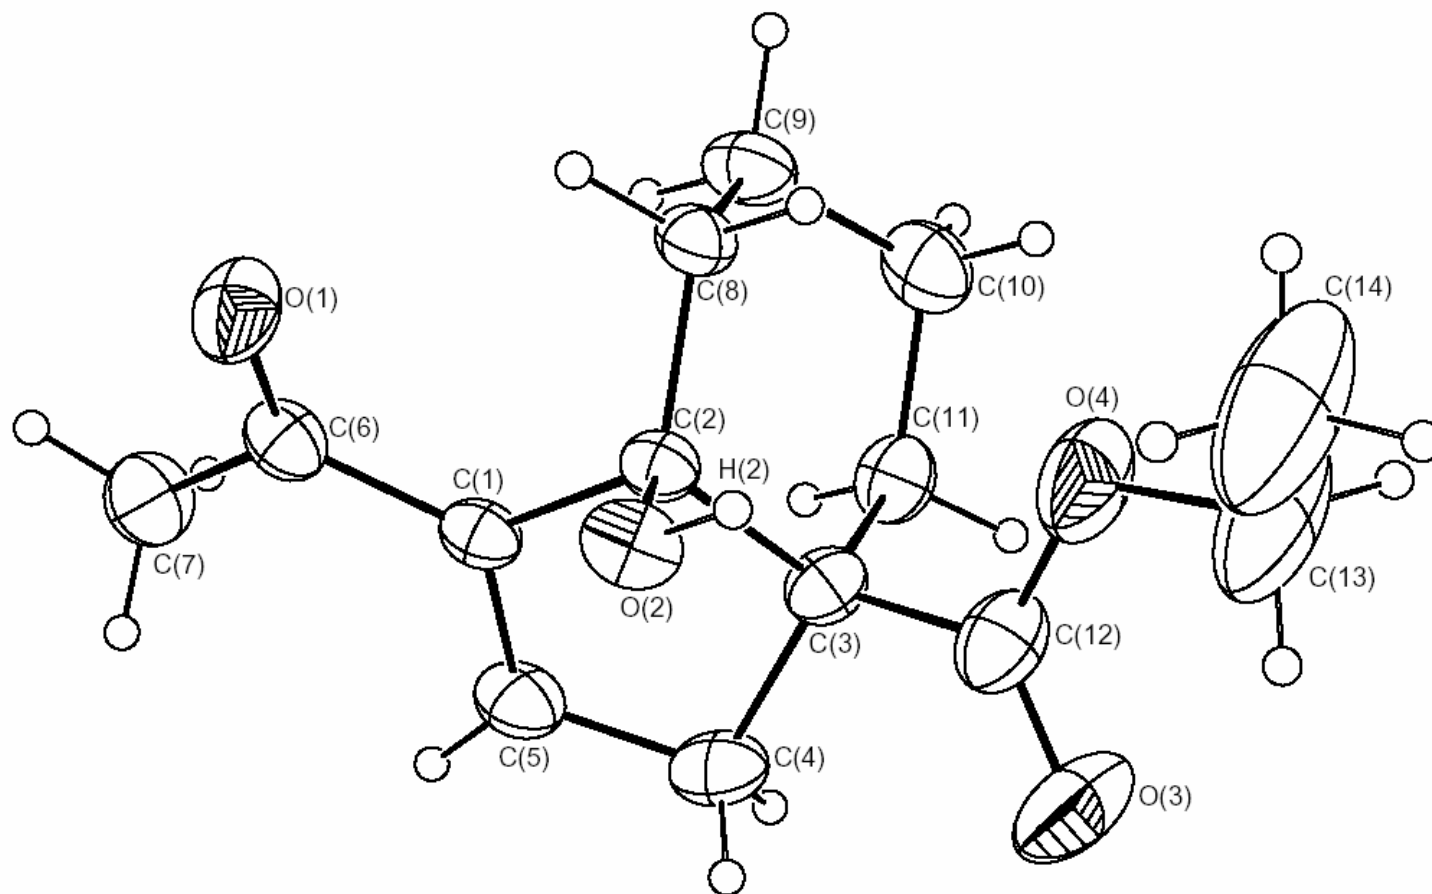

ORTEP DIAGRAM FOR 2,4-DNPH-3c (the 2,4-dinitrophenylhydrazone derivative of 3c)

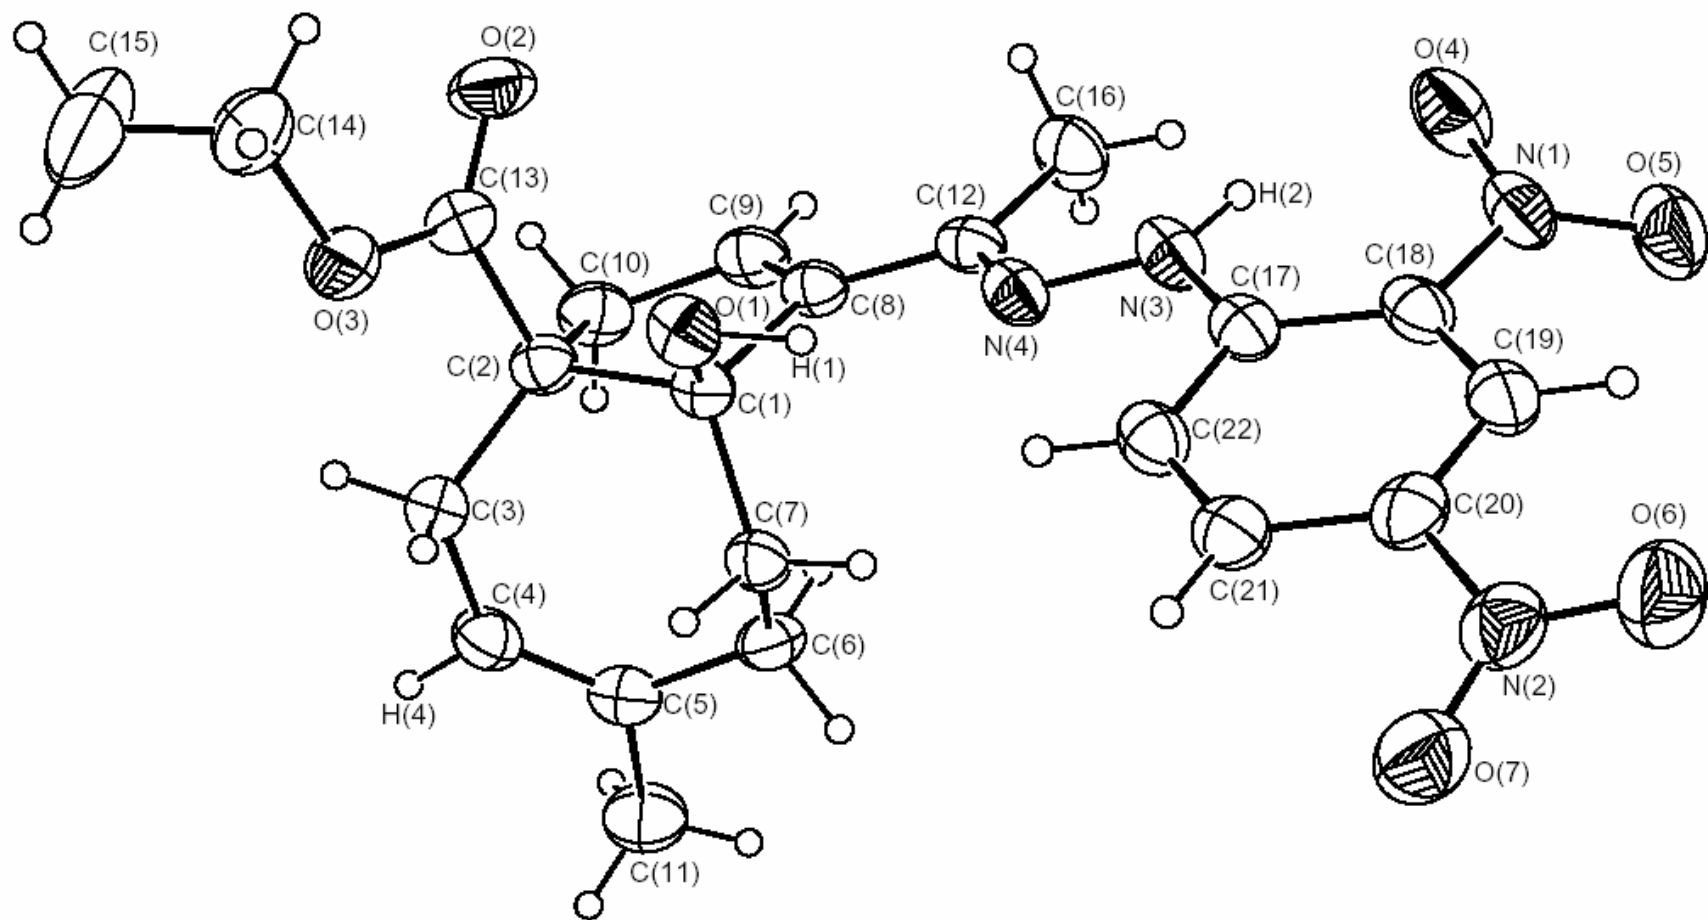

Supplement: b407842j(2).pdf [file b407842j%282%29.pdf]
